## RESEARCH ARTICLE

# Evaluation of health care professionals' knowledge, attitudes, practices and barriers to pharmacovigilance and adverse drug reaction reporting: A cross-sectional multicentral study

Zakir Khan<sup>1</sup>\*, Yusuf Karatas<sup>1,2</sup>, Syed Muhammad Hamid<sup>3</sup>

**1** Department of Medical Pharmacology, Faculty of Medicines, Çukurova University, Adana, Türkiye, **2** Faculty of Medicines, Balcali Hospital, Adana, Türkiye, **3** Department of Community Medicine, Khyber Medical College, Peshawar, Pakistan

\* These authors contributed equally to this work.

\* zakirkhan@bs.qau.edu.pk, zakirkhan300@gmail.com

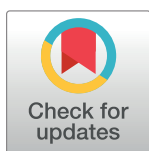

## OPEN ACCESS

**Citation:** Khan Z, Karatas Y, Hamid SM (2023) Evaluation of health care professionals' knowledge, attitudes, practices and barriers to pharmacovigilance and adverse drug reaction reporting: A cross-sectional multicentral study. PLoS ONE 18(5): e0285811. <https://doi.org/10.1371/journal.pone.0285811>

**Editor:** Wudneh Simegn Belay, University of Gondar, ETHIOPIA

**Received:** February 22, 2023

**Accepted:** April 29, 2023

**Published:** May 24, 2023

**Copyright:** © 2023 Khan et al. This is an open access article distributed under the terms of the [Creative Commons Attribution License](https://creativecommons.org/licenses/by/4.0/), which permits unrestricted use, distribution, and reproduction in any medium, provided the original author and source are credited.

**Data Availability Statement:** All relevant data are within the paper and its [Supporting information](#) files.

**Funding:** This study is supported by the PhD project (ÇÜ-BAP No: TDK-2021-14258), Çukurova University, Adana, Türkiye awarded to YK and ZK. The funders had no role in study design, data collection and analysis, decision to publish, or preparation of the manuscript.

## Abstract

### Background

Healthcare professionals' involvement and reporting of adverse drug reactions are essential for the success of a pharmacovigilance program. The aim of this study was to assess health-care professionals (medical doctors, pharmacists, nurses, dentists, midwives, and paramedics) current knowledge, attitude, practices, and barriers regarding pharmacovigilance and adverse drug reactions reporting in multicentral healthcare settings.

### Methods

A cross-sectional face-to-face survey was conducted among currently working healthcare professionals in various hospitals in ten districts of Adana province, Türkiye from March to October 2022. A self-administered, pretested questionnaire (Cronbach's alpha = 0.894 for knowledge, attitudes and practices variables) was used for data collection. The questionnaire's final draft included five sections (sociodemographic/general information, knowledge, attitude, practices, and barriers) with 58 questions. The collected data was analyzed in SPSS (version 25) using descriptive statistics, the chi-square test, and logistic regression.

### Results

Of the total 435 distributed questionnaires, 412 completed the entire questionnaire, yielding a 94% response rate. The majority of healthcare professionals (60.4%; n = 249) had never received pharmacovigilance training. Among healthcare professionals 51.9% (n = 214), 71.1% (n = 293) and 92.5% (n = 381) had poor knowledge, positive attitudes and poor practices, respectively. Only 32.5% of healthcare professionals kept the record of an adverse drug reaction and only 13.1% reported adverse drug reactions. The profession (medical doctors, pharmacists, nurses, dentists, midwives, and paramedics) of healthcare

**Competing interests:** The authors have declared that no competing interests exist.

professionals and a lack of training were predictors of poor adverse drug reaction reporting ( $p < 0.05$ ). A statistically significant difference in healthcare professionals and knowledge, attitude and practices scores was also observed ( $p < 0.05$ ). The main barriers which were supposed to discourage adverse drug reactions reporting by the healthcare professionals were higher workload (63.8%) followed by thinking that a single adverse drug reaction report makes no impact (63.6%) and lack of a professional atmosphere (51.9%).

## Conclusion

In the current study, most healthcare professionals had poor knowledge and practice, but they had a positive attitude toward pharmacovigilance and adverse drug reactions reporting. Barriers to under-reporting of adverse drug reactions were also highlighted. Periodic training programs, educational interventions, systematic follow-up of healthcare professionals by local healthcare authorities, interprofessional links between all healthcare professionals, and the implementation of mandatory reporting policies are critical for improving healthcare professionals knowledge, practices, patient safety and pharmacovigilance activities.

## Introduction

The World Health Organization (WHO) defines pharmacovigilance (PV) as "the science and activities related to the detection, understanding, and prevention of side effects or other drug-related problems" [1]. Globally, PV is an important clinical discipline for ensuring appropriate medication use and patient safety [2, 3]. PV is primarily focused on adverse drug reactions (ADRs), which can occur when a drug is administered incorrectly to a patient [4]. ADR is defined as any adverse reaction to an unwanted and harmful drug at normal dosages used for disease prevention, diagnosis, therapy, or modifying physiological disorder function [2]. ADR is a serious issue that contributes to increased morbidity and mortality worldwide [3]. It is documented that 5% of patients were hospitalized as a result of ADR, with another 5% experienced ADR during hospitalization [5]. ADR accounts for 197,000 fatalities annually in the European Union [6]. ADRs also increased the financial burden on patients. The total cost of hospitalization in the United States (US) following ADRs in the intensive care unit (ICU) and the non-ICU ward is estimated to be 19,685 US dollars and 13,994 US dollars, respectively [7]. According to reports, each patient's treatment for an ADR is expected to cost on average 9,491 US dollars [7, 8]. Therefore, timely ADR monitoring and spontaneous reporting is essential for patient safety and reducing the financial burden on the healthcare system.

In PV, spontaneous ADR reporting schemes have been a significant source of medical data [9]. The spontaneous reporting of ADRs is the most crucial technique for enhancing PV data on drugs that were released into the market with limited premarketing safety information [10]. This method can help to prevent new medicine tragedies and improve pharmaceutical product safety labeling [11]. The success of a PV program is dependent on healthcare professionals (HCP) participation and reporting of ADRs [9, 10]. Doctors, pharmacists, nurses and other paramedics bear an enormous obligation to report ADRs and strengthen the PV systems [9, 10, 12, 13]. However, spontaneous ADR schemes are linked to low levels of reporting. A systematic review of studies conducted in the European Union found a widespread under-reporting of ADR (median rate of 94% under-reporting) among HCPs [14]. It is the responsibility of all HCPs to recognize, record and report ADRs, and their assistance is also necessary for the early recognition of ADR [15]. However, numerous reasons affect reporting of ADRs by HCP,

such as ignorance, ambiguity regarding the ADR, and difficulty in comprehending the reporting method [9, 16]. Moreover, strong evidence also exists that many ADRs including, serious or severe ADRs are underreported to spontaneous reporting systems [14]. Therefore, it may take a longer time for regulatory actions to remove drugs from the market with an unacceptable safety profile due to the low rate of ADR reporting [15].

Findings from international studies revealed that ADR reporting is related to HCPs' knowledge, attitudes, and practices (KAPs) [4, 12, 15, 16]. It is important to understand HCPs' KAP and perceived barriers to PV and ADR [9, 13, 15]. Periodic evaluation of the HCPs' KAP toward PV and ADR reporting can aid in the development of strategies to improve reporting schemes and ensure patient safety [4, 10, 17]. Most countries have formal policies in place to provide training on PV and assist HCPs to notify their national drug regulatory agency or the pharmaceutical manufacturer about suspected ADRs encountered in clinical practice [4, 5, 11, 12, 17, 18]. In Türkiye, the first PV regulation was published in 2005, and the most recent one went into effect in 2014 [19]. The Turkish pharmacovigilance center (TÜFAM) is responsible for implementing PV in Türkiye [20]. The PV program in Türkiye is still in its infancy, only a few ADRs have been reported to the centre since the implementation of the PV system. According to recent data conveyed by Türkiye to the WHO-Upsala Monitoring center (WHO-UMC), the reported ADRs per million population/year for the years 2017, 2018, 2019, 2020, 2021 and 2022 were 84, 94, 99, 89, 91 and 105 respectively [21, 22]. However, still, Türkiye's reporting rate of ADR is significantly lower than the WHO-UMC's suggested ideal value (200 ADR reports per million/year) [21, 23–25]. More proactive initiatives and policy implementations are needed to encourage PV knowledge and ADR reporting behaviors among HCPs to increase the reporting rate of ADRs in Türkiye [9, 10, 20].

A recent systematic review found a significant KAP gap between PV activities and HCPs in Türkiye [9]. Few studies conducted on a national scale revealed a lack of ADR awareness and reporting among Turkish HCPs [9, 10]. However, these studies are insufficient to fully comprehend the concept of PV among various Turkish HCPs, as well as the reasons for underreporting in Türkiye [9]. Periodic understanding of the KAP of HCPs regarding PV and ADR reporting is crucial for the improved ADR reporting rate because numerous studies have shown that optimizing PV KAP is essential for creating improvement strategies for better ADR reporting systems [4, 12, 17, 26, 27]. Therefore, the aim of this study was to assess the current knowledge, attitudes, and practices (KAP) and barriers of HCPs (medical doctors, pharmacists, nurses, dentists, midwives, and paramedics) regarding PV and ADR reporting in multicentral healthcare settings in the Adana province, Türkiye.

## Materials and methods

### Study design, population, and study setting

A cross-sectional face-to-face questionnaire-based survey was conducted in Adana, Türkiye, targeting currently working HCPs in various healthcare settings. This study was carried out among HCPs working in different hospitals in ten districts of Adana (Cukurova, Seyhan, Yuregir, Saricam, Ceyhan, Kozan, Imamoglu, Karaisali, Karatas, and Yumurtalik) during March to October 2022. Participants in the study were full-time registered HCPs with at least one year of work experience. Healthcare students on a traineeship, HCPs with less than one year of professional experience, and unwilling to participate were excluded.

### Sampling technique and sample size

HCPs who were available on the day of data collection were selected by using a convenience sampling strategy. Participants for convenience sampling are chosen based on their ease of

access and proximity to the study site [28]. The ministry of health, provincial health directorate (Sağlık Bakanlığı, Adana il sağlık müdürlüğü) office in Adana was contacted, and a list of the registered working HCPs was obtained [29]. As per the ministry of health, Adana, the number of registered medical doctors, dentists, pharmacists, nurses, midwives, and paramedics were 2513, 267, 109, 4980, 700, and 1200, respectively. Using a single population proportion formula, the minimal sample size needed was calculated. The total number of registered HCPs was 9769. The minimum required sample size was 370, as per the Raosoft sample size calculator [30]. The response distribution was assumed to be 50%, the error margin was 5% and the confidence level was set at 95% for the estimation of a sample. All HCPs were first divided into groups based on the type of profession, and this list served as the sampling frame. The questionnaire was distributed to 435 HCPs to ensure reliability and account for any missing data or response rate.

### Questionnaire instrument

A comprehensive literature search was conducted to design a questionnaire using keywords and medical subject headings (MeSH) terms such as "knowledge, attitude, and practice; pharmacovigilance; adverse drug reaction reporting by healthcare professionals; barriers to pharmacovigilance and adverse drug reaction reporting." A self-reported questionnaire was developed after a literature review [9, 12, 15, 17, 31–33]. The questionnaire was translated using the direct translation method [34, 35] from the source language (English) to the target language (Turkish, which is the official language of Türkiye) by two qualified and experienced researchers who spoke Turkish as well as English and whose native or inborn language was Turkish. Both researchers were aware of the aims and objectives of the questionnaire. Furthermore, the questionnaire was adopted and modified as per WHO PV readings guidelines [36].

After that, the questionnaire was reviewed by three academic expert researchers to determine its suitability, consistency, adequacy, and validity. The questionnaire was tested in Cukurova University's faculty of medicine, department of medical pharmacology and affiliated hospital (Balcali Hastanesi: Balcali hospital) with 30 HCPs (5 doctors, 5 dentists, 5 pharmacists, 5 nurses, 5 midwives, and 5 paramedics) to determine comprehension of the language used in the questionnaire and its suitability for accurately measuring the variables under observation. HCPs selected for the pilot study were excluded from the study's final sample. Several changes were made based on feedback from the pre-tested questionnaire, including changes to the KAP variables, the removal of repetitive questions, and the inclusion of question related to PV training. Furthermore, the internal consistency "reliability" of the items was calculated using Cronbach's alpha (a value of more than 7 is regarded as acceptable to indicate a good fit for internal consistency). Using the Statistical Package for the Social Sciences (SPSS: Chicago, IL, U.S.A, Version 25.0), the questionnaire items' internal consistency for knowledge, attitude, and practices was determined as Cronbach's alpha value 0.894 (Cronbach's Alpha based on standardized items = 0.883). The questionnaire's reliability of each section followed: knowledge (0.797), attitude (0.908) and practice (0.741). Following these changes, principal investigators distributed the final questionnaire to eligible HCPs in various healthcare settings.

### Data collection tool (questionnaire)

The data was gathered using a structured questionnaire. The questionnaire's final draft included five sections and 58 questions (S1 File).

1. The first section included sociodemographic and general information (Gender, age, profession, workplace, name of working district, experience, and prior training on PV)

2. The second part contained two sections. The first consisted of 1 to 8 closed-ended questions (Yes/No), and the second consisted of 1 to 8 multiple-choice items about PV and ADR reporting knowledge.
3. The third section included 9 Likert-scale questions (5 points: strongly disagree, disagree, uncertain, agree, strongly agree) about HCPs' attitudes toward PV and ADR reporting.
4. The fourth section included eight closed-ended questions (Yes/No) about HCPs' PV and ADR reporting practices.
5. The final section included 18 closed-ended questions (Yes/No/I don't know) to understand the barriers and reasons regarding the PV and ADRs reporting system.

### Statistical analysis

First, the final collected information was reviewed for discrepancies and missing data. The data from each questionnaire was then entered into SPSS for statistical analysis. Various statistical measuring techniques used in this study are listed below;

### Measuring techniques

**Descriptive statistics:** Frequency, percentage, mean and standard deviation were used to analyze the data.

**Modified Bloom's cut-off point criteria for KAP score:** The overall percent score cut-off was determined using modified Bloom's cut-off point criteria, which had previously been used in related studies [26, 27]. For the knowledge section, we chose 8 questions (1–8 from section 2a), with each correct response (yes:1) receiving a score of one and incorrect response (no:0) receiving a zero score. The total score for all items was 8. HCPs were classified as "good knowledge" if the score ranged from 75%–100% (6–8 points), "moderate knowledge" if the score ranged from 50–74% (4–5 points), and "poor knowledge" if the score ranged less than 50% (less than 4 points) [26, 27]. Respondents were asked to rate how much they agreed or disagreed with various statements including, "strongly disagree," "disagree," "uncertain," "agree," and "strongly agree" on a 5-point Likert scale attitude section (9 questions), with values ranging from 1 to 5. When all of the items are added together, the total score is 45. The original Bloom's cut-off point was used to categorize overall attitude levels [26, 27]. A "positive attitude" was defined as a score of 80–100% (36–45 points), a "moderate attitude" as a score of 60–79% (27–35 points), and a "negative attitude" as a score of less than 60% (26 points). There were also eight yes/no questions about practice-related behavior. The "yes" response received a 1, while the "no" response received a 0. Using Bloom's original cutoff point, the total practice score was classified as "good practice" if it was 80–100 percent (7–8 points) and "poor practice" if it was less than 80 percent (6 points) [26, 27].

**Chi-square test analysis:** Chi-square test analysis was used to evaluate the results of HCPs responses for comparison purposes.

**Logistic regression:** Univariate and multivariate logistic regression tests were used to identify the factors associated with ADR reporting. The ADR reporting (ever sent a suspected ADR report to a hospital/national PV center) was the dependent variable, while gender, profession, workplace, district, experience, and PV training were included as independent variables. A p-value of less than 0.05 is considered statistically significant.

### Ethics approval

This study was approved by the Cukurova University Bioethics committee (Meeting number: 11; reference number: 50243401/2021-6; Dated: 21/05/2021). In addition, ethical approvals

were also taken from the ministry of health, provincial health directorate (Sağlık Bakanlığı, Adana il sağlık müdürlüğü) office in Adana (Reference number: E-96172664-604.01.02 Dated: 26/11/2021). Both informed and written consent was sought from each participant by using a consent form before they were enrolled in the study. Survey confidentiality and anonymity were assured to all enrolled participants.

## Results

Of the total 435 distributed questionnaires, 412 (150 nurses, 105 doctors, 70 paramedics, 38 dentists, 29 midwives, and 20 pharmacists) completed the entire questionnaire, yielding a 94% response rate. Twenty-three were excluded (missing information = 8, lack of time = 11, and having less than 1 year of experience = 4) from the final analysis. Females (63.8%) were more than males (36.2%). The mean ( $\pm$  SD) age of the HCPs was 36.7 ( $\pm$  8.97) years, ranging from 22 to 61 years. Among the respondents' institutions, 61.4% ( $n = 253$ ) were government hospitals, followed by 112 control command centers ( $n = 77$ ; 18.7%), university hospitals ( $n = 32$ ; 7.8%), and private hospitals ( $n = 27$ ; 6.6%). The majority of the HCPs were from Yüreğir (28.4%), Kozan (22.3%), and Cukurova (15.8%) districts. A higher proportion of the HCPs (34.2%;  $n = 141$ ) had been working for more than 15 years. Most of the HCPs (60.4%;  $n = 249$ ) did not attend PV training previously. A statistically significant difference was also observed between profession for gender ( $p$ -value = 0.001), hospital type ( $p$ -value = 0.001), district of working ( $p$ -value = 0.001), experience ( $p$ -value = 0.004), and PV training ( $p$ -value = 0.001) ([Table 1](#)).

### Knowledge about PV and ADR (close-ended questions)

About, 68.2% ( $n = 281$ ) of the respondents indicated that they were aware of the terms "PV" and "ADR". Among all HCPs, the majority of the pharmacists (85%), midwives (82.8%), and medical doctors (73.3%) were aware of the PV term. The majority of pharmacists (85%), midwives (82.2%), nurses (74%), and medical doctors (68.6%) indicated knowing about the ADR term. Most of the participants ( $n = 268$ ; 65%) did not know about the filling of the ADR reporting form. The higher proportion of dentists (84.2%), medical doctors ( $n = 87$ ; 82.9%) and paramedics (82.9%) did not know about the filling of the ADR reporting form. One-fourth proportion (25%;  $n = 103$ ) of the HCPs were aware regarding the International PV and ADR monitoring center. Of these, dentists (94.7%), midwives (82.8%), medical doctors (81%), and paramedics (74.3%) did not know about the International PV and ADR monitoring center however, pharmacists (70%) and nurses (29.3%) indicated their awareness about the center. More than half of the HCPs (57.8%;  $n = 238$ ) were unable to explain TÜFAM expansion. Pharmacists (75%), midwives (65.5%), and paramedics (45.7%) were more able to define TÜFAM expansion as compared to nurses (44.7%), dentists (39.5%), and medical doctors (24.8%). Additionally, 51.9% ( $n = 214$ ) of HCPs were aware of hospital PV contact points. The majority of the pharmacists (85%), midwives (69%), and nurses (68.7%) were aware of hospital PV. A statistically significant difference ( $p$ -value < 0.05) was also observed among most of the knowledge-related variables (close-ended questions) and HCPs professions ([Table 2](#)). The overall mean knowledge score was  $3.47 \pm 2.37$  (min-max = 0–8). More than half of the HCPs ( $n = 214$ ; 51.9%) had poor knowledge. Among these, paramedics (71.4%), medical doctors (64.7%), and dentists (50%) had poor knowledge as compared to nurses (41.3%), midwives (37.9%), and pharmacists (20%). About, 24.5% ( $n = 101$ ) and 23.5% ( $n = 97$ ) of the HCPs had moderate and good knowledge, respectively. Pharmacists (65%) and nurses (31.3%) had more good knowledge of PV and ADRs than other HCPs. A statistically significant difference was also observed for HCPs' professions and knowledge score ( $p$ -value = 0.00) ([S1 Table](#)).

Table 1. Demographic variables and general information of HCPs (n = 412).

| Variables                    | Doctor<br>(n = 105) | Dentist<br>(n = 38) | Pharmacist<br>(n = 20) | Nurse<br>(n = 150) | Midwife<br>(n = 29) | Paramedic<br>(n = 70) | Total<br>(n = 412) | *P-value |
|------------------------------|---------------------|---------------------|------------------------|--------------------|---------------------|-----------------------|--------------------|----------|
| Gender                       |                     |                     |                        |                    |                     |                       |                    | 0.001    |
| Female                       | 40 (38.1)           | 18 (47.4)           | 12 (60)                | 121 (80.7)         | 27 (93.1)           | 45 (64.3)             | 263 (63.8)         |          |
| Male                         | 65 (61.9)           | 20 (52.6)           | 8 (40)                 | 29 (19.3)          | 2 (6.9)             | 25 (35.7)             | 149 (36.2)         |          |
| Workplace                    |                     |                     |                        |                    |                     |                       |                    | 0.001    |
| Government/Public hospital   | 61 (58.1)           | 35 (92.1)           | 16 (80)                | 114 (76)           | 26 (89.7)           | 1 (1.4)               | 253 (61.4)         |          |
| 112 Control command center   | 9 (8.6)             | 0 (0)               | 0 (0)                  | 2 (1.9)            | 0 (0)               | 66 (94.3)             | 77 (18.7)          |          |
| University hospital          | 16 (15.2)           | 1 (2.6)             | 1 (5)                  | 13 (8.7)           | 1 (3.4)             | 0 (0)                 | 32 (7.8)           |          |
| Private hospital             | 10 (9.5)            | 2 (5.2)             | 3 (15)                 | 10 (6.6)           | 0 (0)               | 2 (2.8)               | 27 (6.6)           |          |
| Integrated district hospital | 5 (4.8)             | 0 (0)               | 0 (0)                  | 5 (3.3)            | 2 (6.9)             | 1 (1.4)               | 13 (3.2)           |          |
| Family healthcare center     | 4 (3.8)             | 0 (0)               | 0 (0)                  | 6 (4)              | 0 (0)               | 0 (0)                 | 10 (2.4)           |          |
| District                     |                     |                     |                        |                    |                     |                       |                    | 0.001    |
| Yuregir                      | 35 (33.3)           | 17 (44.7)           | 2 (10)                 | 30 (20)            | 1 (3.4)             | 32 (45.7)             | 117 (28.4)         |          |
| Kozan                        | 26 (24.8)           | 8 (21)              | 4 (20)                 | 41 (27.3)          | 13 (44.8)           | 0 (0)                 | 92 (22.3)          |          |
| Cukurova                     | 14 (13.3)           | 9 (23.7)            | 10 (50)                | 18 (12)            | 2 (6.9)             | 12 (17.1)             | 65 (15.8)          |          |
| Karaisali                    | 6 (5.7)             | 2 (5.2)             | 2 (10)                 | 26 (17.3)          | 6 (20.7)            | 1 (1.4)               | 43 (10.4)          |          |
| Seyhan                       | 6 (5.7)             | 1 (2.6)             | 0 (0)                  | 7 (4.7)            | 0 (0)               | 22 (31.4)             | 36 (8.7)           |          |
| Ceyhan                       | 7 (6.7)             | 1 (2.6)             | 0 (0)                  | 10 (6.7)           | 0 (0)               | 1 (1.4)               | 19 (4.6)           |          |
| Saricam                      | 5 (4.7)             | 0 (0)               | 2 (10)                 | 8 (5.3)            | 1 (3.4)             | 2 (2.8)               | 18 (4.4)           |          |
| Imamoglu                     | 1 (0.9)             | 0 (0)               | 0 (0)                  | 5 (3.3)            | 5 (17.2)            | 0 (0)                 | 11 (2.7)           |          |
| Yumurtalik                   | 5 (4.7)             | 0 (0)               | 0 (0)                  | 1 (0.7)            | 0 (0)               | 0 (0)                 | 6 (1.5)            |          |
| Kararatas                    | 0 (0)               | 0 (0)               | 0 (0)                  | 4 (2.7)            | 1 (3.4)             | 0 (0)                 | 5 (1.2)            |          |
| Working experience           |                     |                     |                        |                    |                     |                       |                    | 0.04     |
| 1–5 years                    | 29 (27.6)           | 9 (23.7)            | 8 (40)                 | 26 (17.3)          | 7 (24.1)            | 7 (10)                | 86 (20.9)          |          |
| 6–10 years                   | 17 (16.2)           | 12 (31.6)           | 2 (10)                 | 28 (18.7)          | 3 (10.3)            | 25 (35.7)             | 87 (21.1)          |          |
| 11–15 years                  | 24 (22.8)           | 7 (18.4)            | 4 (20)                 | 36 (24)            | 5 (17.2)            | 22 (31.4)             | 98 (23.8)          |          |
| More than 15                 | 35 (33.3)           | 10 (26.3)           | 6 (30)                 | 60 (40)            | 14 (48.3)           | 16 (22.8)             | 141 (34.2)         |          |
| PV training                  |                     |                     |                        |                    |                     |                       |                    | 0.001    |
| Yes                          | 30 (28.6)           | 15 (39.5)           | 11 (55)                | 82 (54.7)          | 19 (65.5)           | 6 (8.6)               | 163 (39.6)         |          |
| No                           | 75 (71.4)           | 23 (60.5)           | 9 (45)                 | 68 (45.3)          | 10 (34.5)           | 64 (91.4)             | 249 (60.4)         |          |

\*P-value: Chi square test, PV: Pharmacovigilance

<https://doi.org/10.1371/journal.pone.0285811.t001>

### Knowledge about PV and ADR (multiple choice questions: Only one response was allowed)

Most of the HCPs indicated that they heard the PV term for the first time during the “student stage” (35.2%; n = 145) followed by “training/continuing education programs” (29.4%; n = 121) and “in this survey” (21.8%; n = 90). Paramedics (52.9%) followed by dentists (23.7%) and nurses (18%) answered that they heard the PV term in this survey. Pharmacists (55%) and medical doctors (52.4%) stated that they heard the term PV when they were students. The terms ‘PV’ and “ADR” were correctly indicated by 71.4% (n = 294) and 69.7% (n = 287) of the participants. Pharmacists (85%) followed by midwives (82.7%) and medical doctors (77.1%) indicated the correct definition of PV. Similarly, a correct answer regarding the ADR definition was given by pharmacists (90%), midwives (79.3%), and medical doctors (79%) as compared to

Table 2. Knowledge (close-ended question) of HCPs about PV and ADRs.

| Close-ended questions                                   | Professions              | Yes        | No         | *P-value |
|---------------------------------------------------------|--------------------------|------------|------------|----------|
| Awareness about PV                                      | Medical doctor (n = 105) | 77 (73.3)  | 28 (26.7)  | 0.001    |
|                                                         | Dentist (n = 38)         | 24 (63.1)  | 14 (18.9)  |          |
|                                                         | Pharmacist (n = 20)      | 17 (85)    | 3 (15)     |          |
|                                                         | Nurse (n = 150)          | 109 (72.7) | 41 (27.3)  |          |
|                                                         | Midwife (n = 29)         | 24 (82.8)  | 5 (17.2)   |          |
|                                                         | Paramedic (n = 70)       | 30 (42.9)  | 40 (57.1)  |          |
|                                                         | Total (412)              | 281 (68.2) | 131 (31.8) |          |
| Awareness about ADR                                     | Medical doctor (n = 105) | 72 (68.6)  | 33 (31.4)  | 0.001    |
|                                                         | Dentist (n = 38)         | 20 (52.6)  | 18 (47.4)  |          |
|                                                         | Pharmacist (n = 20)      | 17 (85)    | 3 (15)     |          |
|                                                         | Nurse (n = 150)          | 111 (74)   | 39 (26)    |          |
|                                                         | Midwife (n = 29)         | 24 (82.8)  | 5 (17.2)   |          |
|                                                         | Paramedic (n = 70)       | 37 (52.9)  | 33 (47.1)  |          |
|                                                         | Total (412)              | 281 (68.2) | 131 (31.8) |          |
| Aware about the difference between ADR and AEs          | Medical doctor (n = 105) | 57 (54.3)  | 48 (45.7)  | 0.001    |
|                                                         | Dentist (n = 38)         | 19 (50)    | 19 (50)    |          |
|                                                         | Pharmacist (n = 20)      | 15 (75)    | 5 (25)     |          |
|                                                         | Nurse (n = 150)          | 65 (43.3)  | 85 (56.7)  |          |
|                                                         | Midwife (n = 29)         | 8 (27.6)   | 21 (72.4)  |          |
|                                                         | Paramedic (n = 70)       | 12 (17.1)  | 58 (82.9)  |          |
|                                                         | Total (412)              | 176 (42.7) | 236 (57.3) |          |
| Read research publications and books on PV and ADR      | Medical doctor (n = 105) | 12 (11.4)  | 93 (88.6)  | 0.93     |
|                                                         | Dentist (n = 38)         | 4 (10.5)   | 34 (89.5)  |          |
|                                                         | Pharmacist (n = 20)      | 7 (35)     | 13 (65)    |          |
|                                                         | Nurse (n = 150)          | 24 (16)    | 126 (84)   |          |
|                                                         | Midwife (n = 29)         | 3 (10.3)   | 26 (89.7)  |          |
|                                                         | Paramedic (n = 70)       | 8 (11.4)   | 62 (88.6)  |          |
|                                                         | Total (412)              | 58 (14.1)  | 354 (85.9) |          |
| Knowledge about filling out the ADR reporting form      | Medical doctor (n = 105) | 18 (17.1)  | 87 (82.9)  | 0.001    |
|                                                         | Dentist (n = 38)         | 6 (15.8)   | 32 (84.2)  |          |
|                                                         | Pharmacist (n = 20)      | 12 (60)    | 8 (40)     |          |
|                                                         | Nurse (n = 150)          | 78 (52)    | 72 (48)    |          |
|                                                         | Midwife (n = 29)         | 18 (62.1)  | 11 (37.9)  |          |
|                                                         | Paramedic (n = 70)       | 12 (17.1)  | 58 (82.9)  |          |
|                                                         | Total (412)              | 144 (35)   | 268 (65)   |          |
| Awareness of International PV and ADR monitoring center | Medical doctor (n = 105) | 20 (19)    | 85 (81)    | 0.001    |
|                                                         | Dentist (n = 38)         | 2 (5.3)    | 36 (94.7)  |          |
|                                                         | Pharmacist (n = 20)      | 14 (70)    | 6 (30)     |          |
|                                                         | Nurse (n = 150)          | 44 (29.3)  | 106 (70.7) |          |
|                                                         | Midwife (n = 29)         | 5 (17.2)   | 24 (82.8)  |          |
|                                                         | Paramedics (n = 70)      | 18 (25.7)  | 52 (74.3)  |          |
|                                                         | Total (412)              | 103 (25)   | 309 (75)   |          |
| Able to explain TÜFAM expansion                         | Medical doctor (n = 105) | 26 (24.8)  | 79 (75.2)  | 0.001    |
|                                                         | Dentist (n = 38)         | 15 (39.5)  | 23 (60.5)  |          |
|                                                         | Pharmacist (n = 20)      | 15 (75)    | 5 (25)     |          |
|                                                         | Nurse (n = 150)          | 67 (44.7)  | 83 (55.3)  |          |
|                                                         | Midwife (n = 29)         | 19 (65.5)  | 10 (34.5)  |          |

(Continued)



Table 2. (Continued)

| Close-ended questions                      | Professions              | Yes        | No         | *P-value |
|--------------------------------------------|--------------------------|------------|------------|----------|
|                                            | Paramedic (n = 70)       | 32 (45.7)  | 38 (54.3)  |          |
|                                            | Total (412)              | 174 (42.2) | 238 (57.8) |          |
| Awareness about hospital PV contact point. | Medical doctor (n = 105) | 40 (38.1)  | 65 (61.9)  | 0.001    |
|                                            | Dentist (n = 38)         | 17 (44.7)  | 21 (55.3)  |          |
|                                            | Pharmacist (n = 20)      | 17 (85)    | 3 (15)     |          |
|                                            | Nurse (n = 150)          | 103 (68.7) | 47 (31.3)  |          |
|                                            | Midwife (n = 29)         | 20 (69)    | 9 (31)     |          |
|                                            | Paramedic (n = 70)       | 17 (24.3)  | 53 (75.7)  |          |
|                                            | Total (412)              | 214 (51.9) | 198 (48.1) |          |

\*P-value: Chi square test, PV: Pharmacovigilance, ADR: Adverse drug reaction, AEs: Adverse events, TÜFAM [English: Turkish pharmacovigilance center, Turkish: Türkiye Farmakovijilans Merkezi].

<https://doi.org/10.1371/journal.pone.0285811.t002>

other groups of HCPs. More than half of the HCPs (n = 210; 51%) were aware that all ADRs (all serious ADRs, related to drugs, herbs, new drugs, vaccines, cosmetics, and old drugs) must be reported. However, 18.2% (n = 75) did not know about which ADRs must be reported. Among them, the majority of the midwives (65.5%) and pharmacists (65%) indicated a correct response that all ADRs should be reported. Moreover, most of the respondents indicated that a serious ADR must be reported to the national PV center within 7 days (n = 102; 24.8%) followed by 15 days (n = 68; 16.5%). Pharmacists (25%), midwives (20.7%), and paramedics (20%) respond with the right option that a serious ADR must be reported to the national PV center within 15 days. Nearly half of the participants (49.3%; 203) did not encounter ADR during their working experience. Most of the dentists (63.1%), nurses (58.7%), and paramedics (52.8%) reported that they did not encounter any ADR during their work experience. A statistically significant difference was also observed between professions for “first hear the PV term (p = 0.001), “appropriate ADR definition (p = 0.001), “which ADRs must be reported (p = 0.002), and “ADR-related patients encountered during work experience (p = 0.001)” while no statistical difference between professions for “most accurate definition of PV (p = 0.89) and “a serious ADR must be reported to the national PV center (p = 0.384) (Table 3).

### Source of information and responsible person for PV and ADR reporting (multiple choice questions: More than one response was allowed)

Internet (n = 294; 71.4%) and drug package inserts/leaflets (n = 195; 47.3%) were the main sources of information utilized by HCPs about PV and ADR. The majority of the paramedics (85.7%), medical doctors (72.4%), and nurses (79.7%) utilized the internet as a main source of information about ADR as compared to midwives (65.5%), pharmacists (65%), and dentists (52.6%). In terms of questions related to the responsible person for ADR reporting, most of the participants indicated a medical doctor/physician (47.6%; n = 196), pharmacist (40.8%; n = 168), and all HCPs (37.6%; n = 155). Moreover, the majority of the pharmacists (50%), paramedics (45.7%), and medical doctors (41.9%) respond with the correct answer that all HCPs are responsible for ADR reporting. A statistically significant difference was also measured (p-value < 0.05) (Table 4).

### Attitude toward PV and ADRs among HCPs

A high proportion of the HCPs agreed/strongly agreed that documentation of ADR is important (85.7% n = 353) for a better healthcare system. Of these most of the pharmacists (80%),

Table 3. Multiple choice knowledge questions about PV and ADR among HCPs (n = 412).

| *Multiple-choice questions                                                                              | Doctor<br>(n = 105) | Dentist<br>(n = 38) | Pharmacist<br>(n = 20) | Nurse<br>(n = 150) | Midwife<br>(n = 29) | Paramedic<br>(n = 70) | Total         | **P-value |
|---------------------------------------------------------------------------------------------------------|---------------------|---------------------|------------------------|--------------------|---------------------|-----------------------|---------------|-----------|
| <b>When did you first hear the PV term in?</b>                                                          |                     |                     |                        |                    |                     |                       |               | 0.001     |
| This survey                                                                                             | 11 (10.5)           | 9 (23.7)            | 1 (5)                  | 27 (18)            | 5 (17.2)            | 37 (52.9)             | 90<br>(21.8)  |           |
| Training/continuing education programs                                                                  | 16 (15.2)           | 14 (36.8)           | 7 (35)                 | 60 (40)            | 12 (41.4)           | 12 (17.1)             | 121<br>(29.4) |           |
| When I was a student                                                                                    | 55 (52.4)           | 12 (31.6)           | 11 (55)                | 44 (29.3)          | 9 (31)              | 14 (20)               | 145<br>(35.2) |           |
| In congress/meetings                                                                                    | 15 (14.3)           | 0 (0)               | 1 (5)                  | 6 (4)              | 0 (0)               | 4 (5.7)               | 26 (6.3)      |           |
| PV contact point                                                                                        | 6 (5.7)             | 1 (2.6)             | 0 (0)                  | 12 (8)             | 3 (10.3)            | 1 (1.4)               | 23 (5.6)      |           |
| Pharmaceutical company representative                                                                   | 2 (1.9)             | 2 (5.3)             | 0 (0)                  | 1 (0.7)            | 0 (0)               | 2 (2.8)               | 7 (1.7)       |           |
| <b>Most accurate definition of PV?</b>                                                                  |                     |                     |                        |                    |                     |                       |               | 0.89      |
| Activities related to the detection, assessment, understanding, and prevention of adverse drug effects. | 81 (77.1)           | 25 (65.8)           | 17 (85)                | 102 (68)           | 24 (82.7)           | 45 (64.3)             | 294<br>(71.4) |           |
| Detection of the type and frequency of ADRs after a drug has been marketed.                             | 10 (9.5)            | 2 (5.3)             | 0 (0)                  | 5 (3.3)            | 0 (0)               | 5 (7.1)               | 22 (5.3)      |           |
| The process of enhancing drug safety.                                                                   | 2 (1.9)             | 1 (2.6)             | 0 (0)                  | 8 (5.3)            | 1 (3.4)             | 0 (0)                 | 12 (2.9)      |           |
| The science of ADR monitoring in a hospital.                                                            | 0 (0)               | 1 (2.6)             | 0 (0)                  | 1 (0.7)            | 0 (0)               | 0 (0)                 | 2 (0.5)       |           |
| None of the above.                                                                                      | 0 (0)               | 0 (0)               | 0 (0)                  | 0 (0)              | 0 (0)               | 0 (0)                 | 0 (0)         |           |
| Do not know.                                                                                            | 12 (11.4)           | 9 (23.7)            | 3 (15)                 | 34 (22.7)          | 4 (13.8)            | 20 (28.6)             | 82<br>(19.9)  |           |
| <b>Appropriate definition of an ADR?</b>                                                                |                     |                     |                        |                    |                     |                       |               | 0.001     |
| Any undesirable effect of a drug that occurs at normal doses and under normal conditions of use.        | 83 (79)             | 24 (63.1)           | 18 (90)                | 98 (65.3)          | 23 (79.3)           | 41 (58.6)             | 287<br>(69.7) |           |
| Adverse health outcomes associated with irrational/inappropriate use of the drug.                       | 11 (10.5)           | 2 (5.3)             | 0 (0)                  | 17 (11.3)          | 4 (13.8)            | 1 (1.4)               | 35 (8.5)      |           |
| Injury caused by the use of substandard/counterfeit medications.                                        | 0 (0)               | 1 (2.6)             | 0 (0)                  | 2 (1.3)            | 0 (0)               | 0 (0)                 | 3 (0.7)       |           |
| Damage caused by a drug overdose.                                                                       | 1 (0.9)             | 2 (5.3)             | 0 (0)                  | 0 (0)              | 0 (0)               | 6 (8.6)               | 9 (2.2)       |           |
| None of the above.                                                                                      | 0 (0)               | 0 (0)               | 0 (0)                  | 3 (2)              | 1 (3.4)             | 1 (1.4)               | 5 (1.2)       |           |
| Do not know.                                                                                            | 10 (9.5)            | 9 (23.7)            | 2 (20)                 | 30 (20)            | 1 (3.4)             | 21 (30)               | 73<br>(17.7)  |           |
| <b>Which ADRs must be reported?</b>                                                                     |                     |                     |                        |                    |                     |                       |               | 0.002     |
| All serious ADRs.                                                                                       | 30 (28.6)           | 9 (23.7)            | 5 (25)                 | 57 (38)            | 4 (13.8)            | 15 (21.4)             | 120<br>(29.1) |           |
| ADRs to herbal drugs.                                                                                   | 0 (0)               | 1 (2.6)             | 0 (0)                  | 0 (0)              | 0 (0)               | 0 (0)                 | 1 (0.2)       |           |
| ADRs to new drugs.                                                                                      | 1 (0.9)             | 0 (0)               | 0 (0)                  | 2 (1.3)            | 0 (0)               | 0 (0)                 | 3 (0.7)       |           |
| ADRs to vaccines.                                                                                       | 0 (0)               | 0 (0)               | 0 (0)                  | 1 (0.7)            | 0 (0)               | 1 (1.4)               | 2 (0.5)       |           |
| ADRs due to cosmetic use.                                                                               | 0 (0)               | 0 (0)               | 0 (0)                  | 0 (0)              | 0 (0)               | 0 (0)                 | 0 (0)         |           |
| Unknown ADRs to old drugs.                                                                              | 0 (0)               | 0 (0)               | 0 (0)                  | 0 (0)              | 1 (3.4)             | 0 (0)                 | 1 (0.2)       |           |
| All of the above.                                                                                       | 66 (62.8)           | 19 (50)             | 13 (65)                | 60 (40)            | 19 (65.5)           | 33 (47.1)             | 210<br>(51)   |           |
| Do not know.                                                                                            | 8 (7.6)             | 9 (23.7)            | 2 (20)                 | 30 (20)            | 5 (17.2)            | 21 (30)               | 75<br>(18.2)  |           |
| <b>A serious ADR must be reported to the national PV center in?</b>                                     |                     |                     |                        |                    |                     |                       |               | 0.384     |
| 7 days                                                                                                  | 28 (26.7)           | 4 (10.5)            | 6 (30)                 | 42 (28)            | 13 (44.8)           | 9 (12.9)              | 102<br>(24.8) |           |
| 10 days                                                                                                 | 6 (5.7)             | 2 (5.3)             | 1 (5)                  | 10 (6.7)           | 1 (3.4)             | 5 (7.1)               | 25 (6.1)      |           |
| 14 days                                                                                                 | 2 (1.9)             | 2 (5.3)             | 0 (0)                  | 2 (1.3)            | 0 (0)               | 2 (2.6)               | 8 (1.9)       |           |

(Continued)

Table 3. (Continued)

| *Multiple-choice questions                                      | Doctor<br>(n = 105) | Dentist<br>(n = 38) | Pharmacist<br>(n = 20) | Nurse<br>(n = 150) | Midwife<br>(n = 29) | Paramedic<br>(n = 70) | Total         | **P-value |
|-----------------------------------------------------------------|---------------------|---------------------|------------------------|--------------------|---------------------|-----------------------|---------------|-----------|
| 15 days                                                         | 13 (12.4)           | 5 (13.1)            | 5 (25)                 | 25 (16.7)          | 6 (20.7)            | 14 (20)               | 68<br>(16.5)  |           |
| 1 month                                                         | 1 (0.9)             | 1 (2.6)             | 0 (0)                  | 2 (1.3)            | 0 (0)               | 1 (1.4)               | 5 (1.2)       |           |
| Don't know                                                      | 55 (52.4)           | 24 (63.1)           | 8 (40)                 | 69 (46)            | 9 (31)              | 39 (55.7)             | 204<br>(49.5) |           |
| <b>ADR-related patients encountered during work experience?</b> |                     |                     |                        |                    |                     |                       |               | 0.001     |
| None                                                            | 31 (29.5)           | 24 (63.1)           | 9 (45)                 | 88 (58.7)          | 14 (48.3)           | 37 (52.8)             | 203<br>(49.3) |           |
| 1–5                                                             | 42 (40)             | 10 (26.3)           | 11 (55)                | 36 (24)            | 12 (41.4)           | 6 (8.6)               | 117<br>(28.4) |           |
| 6–10                                                            | 14 (13.3)           | 1 (2.6)             | 0 (0)                  | 12 (8)             | 1 (3.4)             | 10 (14.3)             | 38 (9.2)      |           |
| 11–15                                                           | 1 (0.9)             | 0 (0)               | 0 (0)                  | 3 (2)              | 2 (6.9)             | 9 (12.9)              | 15 (3.6)      |           |
| 16–20                                                           | 1 (0.9)             | 0 (0)               | 0 (0)                  | 1 (0.7)            | 0 (0)               | 2 (2.8)               | 4 (1)         |           |
| More than 20                                                    | 16 (15.2)           | 3 (7.9)             | 0 (0)                  | 10 (6.7)           | 0 (0)               | 6 (8.6)               | 35 (10)       |           |

\*Explaining only one response was allowed,

\*\*P-value: Chi square test, PV: Pharmacovigilance, ADR: Adverse drug reaction.

<https://doi.org/10.1371/journal.pone.0285811.t003>

midwives (62.1%), and medical doctors strongly agreed with this statement as compared to other HCPs groups. Most of the HCPs strongly indicated that ADR (serious or non-serious) should be reported (81.5%; n = 336), reporting of ADR makes a significant contribution to patient safety (86.6%; n = 357) and ADR reporting should be made compulsories for all HCPs (71.3%; 294). In these statements' pharmacists, midwives, and medical doctors strongly agreed as compared to other HCPs groups. The majority of the participants (78.1%; n = 322) agreed/strongly agreed that PV should be included as a main topic in medical education. A higher percentage of HCPs including pharmacists (70%), medical doctors (60.9%), midwives (58.6%), paramedics (58.6%), nurses (48%), and dentists (28.9%) strongly agreed with this statement. Moreover, the majority of the HCPs (86.2%; n = 355) agreed/strongly agreed that HCPs who are trained in the field of PV can play a better role in ADR reporting. Concerning the profession, pharmacists (75%), medical doctors (66.7%), midwives (51.7%), paramedics (57.1%), nurses (51.3%), and dentists (42.1%) strongly agreed to this statement. Moreover, a higher proportion of HCPs (70% pharmacists, 58.6% midwives, 53.3% medical doctors, 51.4% paramedics, 49.3% nurses, and 34.2% dentists) were strongly agreed that all HCPs need education about PV and ADR reporting systems. A statistically significant difference was also observed between professions for most of the attitude-related variables (p-value < 0.05). Complete details are given in Table 5. The mean attitude score was 38.37 ± 7.305 (range 9–45), with 71.1% (n = 293) HCPs had positive attitudes, 25% (n = 103) had moderate and 3.9% (n = 16) had negative attitude levels regarding PV and ADRs. Pharmacists, medical doctors, and midwives had a more positive attitude as compared to other HCPs. A statistically significant difference was also observed for HCPs' professions and attitude scores (p = value 0.000) (S1 Table).

### Practices of HCPs towards PV and ADRs

The findings show that more than sixty percent (62.4%; n = 257) of the HCPs didn't notify or mentioned the ADR encountered on the patient's clinical record. Among these, a considerable proportion of medical doctors (45.7%) and midwives (41.4%) claimed that they

Table 4. Source of information and responsible person for PV and ADR reporting (n = 412).

| *Multiple choice questions                            | Responses | Doctor (n = 105) | Dentist (n = 38) | Pharmacist (n = 20) | Nurse (n = 150) | Midwife (n = 29) | Paramedic (n = 70) | Total      | **P-value |
|-------------------------------------------------------|-----------|------------------|------------------|---------------------|-----------------|------------------|--------------------|------------|-----------|
| <b>Source of information about PV and ADR? *</b>      |           |                  |                  |                     |                 |                  |                    |            |           |
| Internet                                              | Yes       | 76 (72.4)        | 20 (52.6)        | 13 (65)             | 106 (70.7)      | 19 (65.5)        | 60 (85.7)          | 294 (71.4) | 0.012     |
|                                                       | No        | 29 (27.6)        | 18 (47.4)        | 7 (35)              | 44 (29.3)       | 10 (34.5)        | 10 (14.3)          | 118 (28.6) |           |
| Scientific journal articles                           | Yes       | 33 (31.4)        | 9 (23.7)         | 9 (45)              | 20 (13.3)       | 4 (13.8)         | 20 (28.6)          | 95 (23.1)  | 0.001     |
|                                                       | No        | 72 (68.6)        | 29 (76.3)        | 11 (55)             | 130 (86.7)      | 25 (86.2)        | 50 (71.4)          | 317 (76.9) |           |
| Classical textbooks                                   | Yes       | 23 (21.9)        | 5 (13.2)         | 5 (25)              | 11 (7.3)        | 1 (3.4)          | 12 (17.1)          | 57 (13.8)  | 0.006     |
|                                                       | No        | 82 (78.1)        | 33 (86.8)        | 15 (75)             | 139 (92.7)      | 28 (96.6)        | 58 (82.9)          | 355 (86.2) |           |
| Package inserts                                       | Yes       | 56 (53.3)        | 9 (23.7)         | 12 (60)             | 60 (40)         | 15 (51.7)        | 43 (61.4)          | 195 (47.3) | 0.001     |
|                                                       | No        | 49 (46.7)        | 29 (76.3)        | 8 (40)              | 90 (60)         | 14 (48.3)        | 27 (38.6)          | 217 (52.7) |           |
| Advertisement brochures                               | Yes       | 3 (2.9)          | 1 (2.6)          | 2 (10)              | 2 (1.3)         | 2 (6.9)          | 1 (1.4)            | 11 (2.7)   | 0.180     |
|                                                       | No        | 102 (97.1)       | 37 (97.4)        | 18 (90)             | 148 (98.7)      | 27 (93.1)        | 69 (98.6)          | 401 (97.3) |           |
| PV contact person                                     | Yes       | 32 (30.5)        | 10 (26.3)        | 13 (65)             | 68 (45.3)       | 19 (65.5)        | 28 (40)            | 170 (41.3) | 0.001     |
|                                                       | No        | 73 (69.5)        | 28 (73.7)        | 7 (35)              | 82 (54.7)       | 10 (34.5)        | 42 (60)            | 242 (58.7) |           |
| Pharmaceutical representative                         | Yes       | 12 (11.4)        | 2 (5.3)          | 4 (20)              | 5 (3.3)         | 9 (31)           | 2 (2.8)            | 34 (8.3)   | 0.001     |
|                                                       | No        | 93 (88.6)        | 36 (94.7)        | 16 (80)             | 145 (96.7)      | 20 (69)          | 68 (97.1)          | 378 (91.7) |           |
| <b>Responsible person for PV and ADR reporting? *</b> |           |                  |                  |                     |                 |                  |                    |            |           |
| Doctor/physician                                      | Yes       | 57 (54.3)        | 14 (36.8)        | 13 (65)             | 68 (45.3)       | 20 (69)          | 24 (34.3)          | 196 (47.6) | 0.005     |
|                                                       | No        | 48 (45.7)        | 24 (63.2)        | 7 (35)              | 82 (54.7)       | 9 (31)           | 46 (65.7)          | 216 (52.4) |           |
| Pharmacist                                            | Yes       | 38 (36.2)        | 17 (44.7)        | 10 (50)             | 74 (49.3)       | 19 (65.5)        | 10 (14.3)          | 168 (40.8) | 0.001     |
|                                                       | No        | 67 (63.8)        | 21 (55.3)        | 10 (50)             | 76 (50.7)       | 10 (34.5)        | 60 (85.7)          | 244 (59.2) |           |
| Nurse                                                 | Yes       | 24 (22.9)        | 2 (5.3)          | 7 (35)              | 51 (34)         | 11 (37.9)        | 8 (11.4)           | 103 (25)   | 0.001     |
|                                                       | No        | 81 (77.1)        | 36 (94.7)        | 13 (65)             | 99 (66)         | 18 (62.1)        | 62 (88.6)          | 309 (75)   |           |
| Dentist                                               | Yes       | 25 (23.8)        | 10 (26.3)        | 7 (35)              | 14 (9.3)        | 3 (10.3)         | 6 (8.6)            | 65 (15.8)  | 0.001     |
|                                                       | No        | 80 (76.2)        | 28 (73.7)        | 13 (65)             | 136 (90.7)      | 26 (89.7)        | 64 (91.4)          | 347 (84.2) |           |
| Midwife                                               | Yes       | 3 (2.9)          | 0 (0)            | 4 (20)              | 15 (10)         | 7 (24.1)         | 3 (4.3)            | 32 (7.8)   | 0.001     |
|                                                       | No        | 102 (97.2)       | 38 (100)         | 16 (80)             | 135 (90)        | 22 (75.9)        | 67 (95.7)          | 380 (92.2) |           |
| Paramedic                                             | Yes       | 3 (2.9)          | 2 (5.3)          | 1 (5)               | 13 (8.7)        | 1 (3.4)          | 5 (7.1)            | 25 (6.1)   | 0.514     |
|                                                       | No        | 102 (97.2)       | 36 (94.7)        | 19 (95)             | 137 (91.3)      | 28 (96.6)        | 65 (92.9)          | 387 (93.9) |           |
| All HCPs                                              | Yes       | 44 (41.9)        | 7 (14.4)         | 10 (50)             | 50 (33.3)       | 12 (41.4)        | 32 (45.7)          | 155 (37.6) | 0.044     |

(Continued)

Table 4. (Continued)

| *Multiple choice questions | Responses | Doctor (n = 105) | Dentist (n = 38) | Pharmacist (n = 20) | Nurse (n = 150) | Midwife (n = 29) | Paramedic (n = 70) | Total      | **P-value |
|----------------------------|-----------|------------------|------------------|---------------------|-----------------|------------------|--------------------|------------|-----------|
|                            | No        | 61 (58.1)        | 31 (81.6)        | 10 (50)             | 100 (66.7)      | 17 (58.6)        | 38 (54.3)          | 257 (62.4) |           |
| None of the above          | Yes       | 0 (0)            | 0 (0)            | 0 (0)               | 0 (0)           | 1 (3.4)          | 0 (0)              | 1 (0.2)    | 0.02      |
|                            | No        | 105 (100)        | 38 (100)         | 20 (100)            | 150 (100)       | 28 (96.6)        | 70 (100)           | 411 (99.8) |           |
| Don't know                 | Yes       | 8 (7.6)          | 8 (21)           | 1 (5)               | 15 (10)         | 1 (3.4)          | 18 (25.7)          | 51 (12.4)  | 0.001     |
|                            | No        | 97 (92.4)        | 30 (79)          | 19 (95)             | 135 (90)        | 28 (96.6)        | 52 (74.3)          | 361 (87.6) |           |

\*Explaining that more than one response was allowed,

\*\*P-value: Chi square test, PV: Pharmacovigilance; ADR: Adverse drug reaction.

<https://doi.org/10.1371/journal.pone.0285811.t004>

notified/mentioned the encountered ADR as compared to other HCPs groups. Only 32.5% (n = 134) kept the records of ADR and more than half of pharmacists (55%) and midwives (51.7%) indicated that they kept the records of ADRs as compared to the lower percentage of nurses (41.3%), medical doctors (23.8%), paramedics (21.4%) and dentists (15.8%). Only 13.1% (n = 54) of the participants had ever reported ADR to a hospital/national PV center with a higher proportion among pharmacists (55%) as compared to nurses (15.3%), medical doctors (10.5%), midwives (10.3%) and paramedics (8.6%). Moreover, all dentists included in the current study also claimed that they did not send a suspected ADR report. More than half (51.5%; n = 212) of the respondents reported that ADR reporting forms are not easily available in a healthcare institution. The proportion was 81.4%, 61.9%, 55.3%, 36.7%, 31%, and 25% among paramedics, medical doctors, dentists, nurses, midwives, and pharmacists, respectively. Most of the participants, including nurses (41.3%), midwives (34.5%), dentists (31.6%), and medical doctors (29.5%) claimed that they always read the package inserts of the medicine before giving it to patients as compared to paramedics (24.3%) and pharmacists (20%). About 62.9% (n = 259) of the participants indicated that they always counsel patients about the side effects and possible ADRs of drugs and a higher proportion was observed among midwives (82.8%), pharmacists (70%), paramedics (68.6%), and doctors (61.9%). A statistically significant difference (p-value < 0.05) between the profession of HCPs for most of the practice-related questions (Table 6). Moreover, the overall mean practice score was  $3.15 \pm 2.141$  (min-max = 0–8). The majority of the HCPs (n = 381; 92.5%) had poor practices towards PV and ADRs. Of these, the proportion of paramedics, dentists, medical doctors, nurses, midwives, and pharmacists was 98.6%, 97.4%, 96.2%, 89.3%, 82.8%, and 80%, respectively. Moreover, only 7.1% (n = 31) of the HCPs had good practices, and pharmacists, midwives and nurses had more good practices than other HCPs group. A statistically significant difference was also observed for HCPs professions and practice scores (p = 0.002) (S1 Table).

### Factors associated with poor ADR reporting practice

A univariable logistic regression showed that the HCPs' profession, district and lack of training were the predictors of poor ADR reporting practice. The findings of the multivariate logistic regression also measured that pharmacist and lack of prior PV training (p-value < 0.05) were linked with the poor practice of ADR reporting (Table 7).

Table 5. Attitude-related questions and profession comparison (n = 412).

| Questions                                                                                          | Doctor (n = 105) | Dentist (n = 38) | Pharmacist (n = 20) | Nurse (n = 150) | Midwife (n = 29) | Paramedic (n = 70) | Total      | *P-value |
|----------------------------------------------------------------------------------------------------|------------------|------------------|---------------------|-----------------|------------------|--------------------|------------|----------|
| Documentation of ADR is important for a better healthcare system.                                  |                  |                  |                     |                 |                  |                    |            | 0.010    |
| SD                                                                                                 | 2 (1.9)          | 1 (2.6)          | 0 (0)               | 9 (6)           | 1 (3.4)          | 2 (2.8)            | 15 (3.6)   |          |
| D                                                                                                  | 0 (0)            | 0 (0)            | 0 (0)               | 2 (1.3)         | 0 (0)            | 2 (2.8)            | 4 (1)      |          |
| U                                                                                                  | 7 (6.7)          | 6 (15.8)         | 0 (0)               | 9 (6)           | 3 (10.3)         | 15 (21.4)          | 40 (9.7)   |          |
| A                                                                                                  | 37 (35.2)        | 14 (36.8)        | 4 (20)              | 64 (42.7)       | 7 (24.1)         | 20 (28.6)          | 146 (35.4) |          |
| SA                                                                                                 | 59 (56.2)        | 17 (44.7)        | 16 (80)             | 66 (44)         | 18 (62.1)        | 31 (44.3)          | 207 (50.2) |          |
| Any ADR (serious or non-serious) should be reported spontaneously.                                 |                  |                  |                     |                 |                  |                    |            | 0.021    |
| SD                                                                                                 | 2 (1.9)          | 0 (0)            | 1 (5)               | 6 (4)           | 1 (3.4)          | 3 (4.3)            | 13 (3.2)   |          |
| D                                                                                                  | 1 (0.9)          | 2 (5.3)          | 0 (0)               | 4 (2.7)         | 1 (3.4)          | 2 (2.8)            | 10 (2.4)   |          |
| U                                                                                                  | 10 (9.5)         | 6 (15.8)         | 0 (0)               | 16 (10.7)       | 2 (6.9)          | 19 (27.1)          | 53 (12.9)  |          |
| A                                                                                                  | 40 (38.1)        | 18 (47.4)        | 5 (25)              | 61 (40.7)       | 8 (27.6)         | 16 (22.8)          | 148 (35.9) |          |
| SA                                                                                                 | 52 (49.5)        | 12 (31.6)        | 14 (70)             | 63 (42)         | 17 (58.6)        | 30 (42.8)          | 188 (45.6) |          |
| Reporting ADR makes a significant contribution to patient safety.                                  |                  |                  |                     |                 |                  |                    |            | 0.014    |
| SD                                                                                                 | 0 (0)            | 0 (0)            | 0 (0)               | 5 (3.3)         | 1 (3.4)          | 3 (4.3)            | 9 (2.2)    |          |
| D                                                                                                  | 2 (1.9)          | 0 (0)            | 0 (0)               | 2 (1.3)         | 0 (0)            | 0 (0)              | 4 (1)      |          |
| U                                                                                                  | 7 (6.7)          | 7 (18.4)         | 0 (0)               | 12 (8)          | 3 (10.3)         | 13 (18.5)          | 42 (10.2)  |          |
| A                                                                                                  | 29 (27.6)        | 15 (39.5)        | 2 (10)              | 52 (34.7)       | 5 (17.2)         | 14 (20)            | 117 (28.4) |          |
| SA                                                                                                 | 67 (63.8)        | 16 (42.1)        | 18 (90)             | 79 (52.7)       | 20 (69)          | 40 (57.1)          | 240 (58.3) |          |
| Reporting ADR should be made compulsories for all HCPs.                                            |                  |                  |                     |                 |                  |                    |            | 0.022    |
| SD                                                                                                 | 2 (1.9)          | 1 (2.6)          | 0 (0)               | 10 (6.7)        | 1 (3.4)          | 4 (5.7)            | 18 (4.4)   |          |
| D                                                                                                  | 8 (7.6)          | 3 (7.9)          | 0 (0)               | 6 (4)           | 2 (6.9)          | 3 (4.3)            | 22 (5.3)   |          |
| U                                                                                                  | 17 (16.2)        | 11 (28.9)        | 0 (0)               | 27 (18)         | 3 (10.3)         | 20 (28.5)          | 78 (18.9)  |          |
| A                                                                                                  | 26 (24.8)        | 13 (34.2)        | 3 (15)              | 40 (26.7)       | 7 (24.1)         | 10 (14.3)          | 99 (24)    |          |
| SA                                                                                                 | 52 (49.5)        | 10 (26.3)        | 17 (85)             | 67 (44.7)       | 16 (55.2)        | 33 (47.1)          | 195 (47.3) |          |
| PV should be included as a core topic in medical education.                                        |                  |                  |                     |                 |                  |                    |            | 0.058    |
| SD                                                                                                 | 3 (2.9)          | 1 (2.6)          | 0 (0)               | 8 (5.3)         | 1 (3.4)          | 2 (2.8)            | 15 (3.6)   |          |
| D                                                                                                  | 3 (2.9)          | 3 (7.9)          | 0 (0)               | 5 (3.3)         | 0 (0)            | 1 (1.4)            | 12 (2.9)   |          |
| U                                                                                                  | 15 (14.3)        | 5 (13.1)         | 0 (0)               | 27 (18)         | 3 (10.3)         | 13 (18.6)          | 63 (15.3)  |          |
| A                                                                                                  | 20 (19)          | 18 (47.4)        | 6 (30)              | 38 (25.3)       | 8 (27.6)         | 13 (18.6)          | 103 (25)   |          |
| SA                                                                                                 | 64 (60.9)        | 11 (28.9)        | 14 (70)             | 72 (48)         | 17 (58.6)        | 41 (58.6)          | 219 (53.2) |          |
| ADR reporting notification is important for the healthcare system.                                 |                  |                  |                     |                 |                  |                    |            | 0.015    |
| SD                                                                                                 | 3 (2.9)          | 0 (0)            | 0 (0)               | 5 (3.3)         | 1 (3.4)          | 2 (2.8)            | 11 (2.7)   |          |
| D                                                                                                  | 2 (1.9)          | 3 (7.9)          | 0 (0)               | 3 (2)           | 0 (0)            | 0 (0)              | 8 (1.9)    |          |
| U                                                                                                  | 5 (4.8)          | 8 (21)           | 0 (0)               | 13 (8.7)        | 2 (6.9)          | 13 (18.6)          | 41 (10)    |          |
| A                                                                                                  | 23 (21.9)        | 13 (34.2)        | 4 (20)              | 45 (30)         | 8 (24.1)         | 17 (24.3)          | 110 (26.7) |          |
| SA                                                                                                 | 72 (68.6)        | 14 (36.8)        | 16 (80)             | 84 (56)         | 18 (62.1)        | 38 (54.3)          | 242 (58.7) |          |
| Do you think that HCPs who are trained in the field of PV can play a better role in ADR reporting? |                  |                  |                     |                 |                  |                    |            | 0.113    |
| SD                                                                                                 | 1 (0.9)          | 0 (0)            | 0 (0)               | 6 (4)           | 1 (3.4)          | 2 (2.8)            | 10 (2.4)   |          |
| D                                                                                                  | 1 (0.9)          | 2 (5.3)          | 0 (0)               | 1 (0.7)         | 0 (0)            | 1 (1.4)            | 5 (1.2)    |          |
| U                                                                                                  | 8 (7.6)          | 7 (18.4)         | 0 (0)               | 13 (8.7)        | 3 (10.3)         | 11 (15.7)          | 42 (10.2)  |          |
| A                                                                                                  | 25 (23.8)        | 13 (34.2)        | 5 (25)              | 53 (35.3)       | 10 (34.5)        | 16 (22.9)          | 122 (29.6) |          |
| SA                                                                                                 | 70 (66.7)        | 16 (42.1)        | 15 (75)             | 77 (51.3)       | 15 (51.7)        | 40 (57.1)          | 233 (56.6) |          |
| Do you believe that all HCPs need education about PV and ADR reporting systems?                    |                  |                  |                     |                 |                  |                    |            | 0.147    |
| SD                                                                                                 | 1 (0.9)          | 0 (0)            | 0 (0)               | 4 (2.7)         | 1 (3.4)          | 3 (4.3)            | 9 (2.2)    |          |
| D                                                                                                  | 4 (3.8)          | 4 (10.5)         | 0 (0)               | 5 (3.3)         | 0 (0)            | 0 (0)              | 13 (3.2)   |          |
| U                                                                                                  | 20 (19)          | 10 (26.3)        | 1 (5)               | 20 (13.3)       | 3 (10.3)         | 14 (20)            | 68 (16.5)  |          |
| A                                                                                                  | 24 (22.9)        | 11 (28.9)        | 5 (25)              | 47 (31.3)       | 8 (27.6)         | 17 (24.3)          | 112 (27.2) |          |

(Continued)

Table 5. (Continued)

| Questions                                        | Doctor (n = 105) | Dentist (n = 38) | Pharmacist (n = 20) | Nurse (n = 150) | Midwife (n = 29) | Paramedic (n = 70) | Total      | *P-value |
|--------------------------------------------------|------------------|------------------|---------------------|-----------------|------------------|--------------------|------------|----------|
| SA                                               | 56 (53.3)        | 13 (34.2)        | 14 (70)             | 74 (49.3)       | 17 (58.6)        | 36 (51.4)          | 210 (51)   |          |
| Do you think that ADRs can even result in death? |                  |                  |                     |                 |                  |                    |            | 0.002    |
| SD                                               | 3 (2.9)          | 0 (0)            | 0 (0)               | 5 (3.3)         | 1 (3.4)          | 2 (2.8)            | 11 (2.7)   |          |
| D                                                | 2 (1.9)          | 4 (10.5)         | 0 (0)               | 1 (0.7)         | 0 (0)            | 2 (2.8)            | 9 (2.2)    |          |
| U                                                | 7 (6.7)          | 7 (18.4)         | 1 (5)               | 17 (11.3)       | 5 (17.2)         | 16 (22.9)          | 53 (12.9)  |          |
| A                                                | 20 (19)          | 15 (39.4)        | 8 (40)              | 41 (27.3)       | 10 (34.5)        | 16 (22.9)          | 110 (26.7) |          |
| SA                                               | 73 (69.5)        | 12 (31.6)        | 11 (55)             | 86 (57.3)       | 13 (44.8)        | 34 (48.6)          | 229 (55.6) |          |

\*P-value: Chi square test, SD: Strongly disagree, D: Disagree, U: Uncertain, A: Agree, SA: Strongly agree, PV: Pharmacovigilance, ADR: Adverse drug reaction; HCPs: Healthcare professionals.

<https://doi.org/10.1371/journal.pone.0285811.t005>

### HCPs' barriers to PV and ADRs reporting

The main barriers which were supposed to discourage ADR reporting by the HCPs were higher workload (n = 263; 63.8%), thinking that a single ADR report makes no impact (n = 262; 63.6%), lack of a professional atmosphere to discuss ADR (n = 214; 51.9%), insufficient financial support by health care authorities (n = 214; 51.9%) and lack of knowledge

Table 6. Practice-related questions and profession comparison (n = 412).

| Questions                                                                  | Responses | Doctor (n = 105) | Dentist (n = 38) | Pharmacist (n = 20) | Nurse (n = 150) | Midwife (n = 29) | Paramedic (n = 70) | Total      | *P-value |
|----------------------------------------------------------------------------|-----------|------------------|------------------|---------------------|-----------------|------------------|--------------------|------------|----------|
| Notified/mentioned the ADR encountered on the patient's clinical record.   |           |                  |                  |                     |                 |                  |                    |            | 0.116    |
|                                                                            | No        | 57 (54.3)        | 30 (79)          | 13 (65)             | 92 (61.3)       | 17 (58.6)        | 48 (68.6)          | 257 (62.4) |          |
|                                                                            | Yes       | 48 (45.7)        | 8 (21)           | 7 (35)              | 58 (38.7)       | 12 (41.4)        | 22 (31.4)          | 155 (37.6) |          |
| Keep records of ADR.                                                       |           |                  |                  |                     |                 |                  |                    |            | 0.001    |
|                                                                            | No        | 80 (76.2)        | 32 (84.2)        | 9 (45)              | 88 (58.7)       | 14 (48.3)        | 55 (78.6)          | 278 (67.5) |          |
|                                                                            | Yes       | 25 (23.8)        | 6 (15.8)         | 11 (55)             | 62 (41.3)       | 15 (51.7)        | 15 (21.4)          | 134 (32.5) |          |
| Ever sent a suspected ADR report to a hospital/national PV center.         |           |                  |                  |                     |                 |                  |                    |            | 0.001    |
|                                                                            | No        | 94 (89.5)        | 38 (100)         | 9 (45)              | 127 (84.7)      | 26 (89.7)        | 64 (91.4)          | 358 (86.9) |          |
|                                                                            | Yes       | 11 (10.5)        | 0 (0)            | 11 (55)             | 23 (15.3)       | 3 (10.3)         | 6 (8.6)            | 54 (13.1)  |          |
| Hospital's HCPs trained in how to report ADR.                              |           |                  |                  |                     |                 |                  |                    |            | 0.001    |
|                                                                            | No        | 85 (81)          | 26 (68.4)        | 7 (35)              | 78 (52)         | 12 (41.4)        | 64 (91.4)          | 272 (66)   |          |
|                                                                            | Yes       | 20 (19)          | 12 (31.6)        | 13 (65)             | 72 (48)         | 17 (58.6)        | 6 (8.6)            | 140 (34)   |          |
| ADR reporting forms are easily accessible in a healthcare institution.     |           |                  |                  |                     |                 |                  |                    |            | 0.001    |
|                                                                            | No        | 65 (61.9)        | 21 (55.3)        | 5 (25)              | 55 (36.7)       | 9 (31)           | 57 (81.4)          | 212 (51.5) |          |
|                                                                            | Yes       | 40 (38.1)        | 17 (44.7)        | 15 (75)             | 95 (63.3)       | 20 (69)          | 13 (18.6)          | 200 (48.5) |          |
| Always read the package inserts of the medicine before giving to patients. |           |                  |                  |                     |                 |                  |                    |            | 0.98     |
|                                                                            | No        | 74 (70.5)        | 26 (68.4)        | 16 (80)             | 88 (58.7)       | 19 (65.5)        | 53 (75.7)          | 276 (67)   |          |
|                                                                            | Yes       | 31 (29.5)        | 12 (31.6)        | 4 (20)              | 62 (41.3)       | 10 (34.5)        | 17 (24.3)          | 136 (33)   |          |
| Advise patients to read the drug leaflets every time                       |           |                  |                  |                     |                 |                  |                    |            | 0.001    |
|                                                                            | No        | 58 (55.2)        | 25 (65.8)        | 12 (60)             | 70 (46.7)       | 11 (37.9)        | 17 (24.3)          | 193 (46.8) |          |
|                                                                            | Yes       | 47 (44.8)        | 13 (34.2)        | 8 (40)              | 80 (53.3)       | 18 (62.1)        | 53 (75.7)          | 219 (53.2) |          |
| Always counsel patients about the side effects and possible ADRs of drugs. |           |                  |                  |                     |                 |                  |                    |            | 0.55     |
|                                                                            | No        | 40 (39)          | 20 (52.6)        | 6 (30)              | 60 (40)         | 5 (17.2)         | 22 (31.4)          | 153 (37.1) |          |
|                                                                            | Yes       | 65 (61.9)        | 18 (47.4)        | 14 (70)             | 90 (60)         | 24 (82.8)        | 48 (68.6)          | 259 (62.9) |          |

\*P-value: Chi square test, PV: Pharmacovigilance, ADR: Adverse drug reaction; HCPs: Healthcare professionals.

<https://doi.org/10.1371/journal.pone.0285811.t006>

Table 7. Logistic regression (Univariable and multivariable) analysis of ADR reporting practice.

| Variables                    | ADR reporting (Yes: 54 and No: 358) |            | Adjusted OR   | Lower and upper 95% CI | P-value |
|------------------------------|-------------------------------------|------------|---------------|------------------------|---------|
|                              | Yes, n(%)                           | No, n(%)   |               |                        |         |
| <b>Gender</b>                |                                     |            |               |                        | 0.887*  |
| Female                       | 34 (63)                             | 229 (64)   | 1             | -                      | -       |
| Male                         | 20 (37)                             | 129 (36)   | 0.731         | 0.346–1.547            | 0.413** |
| <b>Profession</b>            |                                     |            |               |                        | 0.000*  |
| Doctor                       | 11 (20.4)                           | 94 (26.2)  | 1             | -                      | -       |
| Dentist                      | 0 (0)                               | 38 (10.6)  | 0.000         | 0.000–0.000            | 0.997** |
| Pharmacist                   | 11 (20.4)                           | 9 (2.5)    | 7.090         | 1.895–26.535           | 0.004** |
| Nurse                        | 23 (42.6)                           | 127 (35.5) | 1.205         | 0.477–3.047            | 0.693** |
| Midwife                      | 3 (5.5)                             | 26 (7.2)   | 0.460         | 0.096–2.198            | 0.331** |
| Paramedic                    | 6 (11.11)                           | 64 (17.9)  | 0.624         | 0.076–5.139            | 0.661** |
| <b>Workplace</b>             |                                     |            |               |                        | 0.314*  |
| Family healthcare center     | 0 (0)                               | 10 (2.8)   | 1             | -                      | -       |
| Government/Public hospital   | 40 (74)                             | 213 (59.5) | 119695659.135 | 0.000–0.000            | 0.999** |
| Integrated district hospital | 1 (1.8)                             | 12 (3.3)   | 56653835.595  | 0.000–0.000            | 0.999*  |
| University hospital          | 2 (3.7)                             | 30 (8.4)   | 134791441.972 | 0.000–0.000            | 0.999** |
| Private hospital             | 4 (7.4)                             | 23 (6.4)   | 113280405.737 | 0.000–0.000            | 0.999** |
| 112 Control command center   | 7 (12.9)                            | 70 (19.5)  | 345892821.806 | 0.000–0.000            | 0.999** |
| <b>District</b>              |                                     |            |               |                        | 0.000*  |
| Cukurova                     | 17 (31.5)                           | 48 (13.4)  | 1             | -                      | -       |
| Seyhan                       | 2 (3.7)                             | 34 (9.5)   | 0.259         | 0.039–1.730            | 0.163** |
| Yuregir                      | 7 (12.9)                            | 110 (30.7) | 0.230         | 0.068–0.783            | 0.019** |
| Saricam                      | 1 (1.8)                             | 17 (4.7)   | 0.190         | 0.017–2.108            | 0.176** |
| Ceyhan                       | 0 (0)                               | 19 (5.3)   | 0.000         | 0.000–0.000            | 0.998** |
| Kozan                        | 17 (31.5)                           | 75 (20.9)  | 0.514         | 0.179–1.480            | 0.218** |
| Imamoglu                     | 4 (7.4)                             | 7 (1.9)    | 1.630         | 0.305–8.716            | 0.568** |
| Karaisali                    | 6 (11.1)                            | 37 (10.3)  | 0.339         | 0.094–1.224            | 0.099** |
| Kararatas                    | 0 (0)                               | 5 (1.4)    | 0.000         | 0.000–0.000            | 0.999** |
| Yumurtalik                   | 0 (0)                               | 6 (1.7)    | 0.000         | 0.000–0.000            | 0.999** |
| <b>Work experience</b>       |                                     |            |               |                        | 0.888*  |
| 1–5 years                    | 10 (18.5)                           | 76 (21.2)  | 1             | -                      | -       |
| 6–10 years                   | 11(20.4)                            | 76 (21.2)  | 1.226         | 0.399–3.765            | 0.722** |
| 11–15 years                  | 12 (22.2)                           | 86 (24.1)  | 0.890         | 0.304–2.607            | 0.832** |
| More than 15                 | 21 (38.9)                           | 120 (33.5) | 1.033         | 0.383–2.790            | 0.949** |
| <b>PV training</b>           |                                     |            |               |                        | 0.000*  |
| Yes                          | 40 (74)                             | 123 (34.4) | 1             | -                      | -       |
| No                           | 14 (26)                             | 235 (65.6) | 0.172         | 0.076–0.390            | 0.000** |

\*Univariable regression,

\*\* Multivariable regression, PV: Pharmacovigilance, ADR: Adverse drug reaction.

<https://doi.org/10.1371/journal.pone.0285811.t007>

(n = 185; 44.9%). Similarly, with respect to the profession, a higher proportion of medical doctors (74.3%), nurses (63.3%), and midwives (62.1%) reported that a higher workload is the main discouraging factor for ADR reporting as compared to other HCPs. Thinking that a single ADR report makes no impact was the second main barrier as per HCPs' views and most frequently pharmacists (90%) followed by midwives (65.5%) and medical doctors (64.8%) were agreed with this statement. Paramedics (57.1%), medical doctors (56.2%) and nurses



(50.7%), and pharmacists (50%) highlighted that the lack of a professional atmosphere to discuss ADR is also a leading factor. Insufficient financial support by health care authorities was prevalent among medical doctors (65.7%) followed by paramedics (51.4%), nurses (48%), and pharmacists (45%). Lack of knowledge regarding the detection of ADRs was more commonly indicated by pharmacists (70%), midwives (51.7%), and medical doctors (48.6%). All HCPs reported various factors as per their point of view. A statistically significant difference was also reported ( $p$ -value < 0.05). A details comparison between barriers and the HCPs profession is given in [Table 8](#).

## Discussion

To the best of our knowledge, this is a Türkiye's first study on PV and ADRs reporting among various HCPs working in different healthcare settings in 10 districts of Adana. The purpose of the current study was to evaluate HCPs' KAPs regarding PV and ADR reporting, as well as to identify the major barriers and factors that prevent the implementation of a PV and ADR reporting system. Concerning knowledge scores, more than half of the HCPs (51.9%) had poor knowledge in our study. Similar findings were also reported in the Ethiopian study (58.3%) [15]. However, this value was lower in a study carried out in South-West Nigeria (21.7%) [37]. In the current study, 68.2% of the respondents indicated that they were aware of the terms "PV" and "ADR". However, despite the awareness, most of the participants (65%) did not know about filling out the ADR reporting form. Comparable results were also observed in the Ethiopia study (63.2%) [15]. Additionally, our study showed that, only one-fourth (25%) and 51.9% of the HCPs were aware of the International and hospital PV and ADR monitoring center, respectively. Unawareness of international, national, and hospital-based PV centers among HCPs was also observed in previous studies conducted in various countries [15, 38–40]. These data highlighted the lack of knowledge about the international and local PV system components. Moreover, in the present study, 71.4% of the respondents correctly choose the definition of PV. Previously published studies conducted in Pakistan [41] and Nepal [42] also reported that 54.9% and 47.3% of the HCPs correctly select the PV definition. Similarly, 69.7% of respondents indicated the exact definition of ADRs. This value was higher as compared to studies carried out in Pakistan (62%) [43] and Ethiopia (29.3%) [15]. It is recommended to conduct periodic educational intervention to improve knowledge scores among HCPs [12]. Therefore, healthcare authorities should provide compulsory periodic PV-related courses and mandatory training for all HCPs.

In this study, a higher proportion of the participants (71.1%) had positive attitudes score and the attitude of pharmacists and medical doctors were quite encouraging as compared to other HCPs. A consistent finding was also reported in previous studies [17, 31, 37]. The positive attitude of respondents toward ADR reporting is an important factor because proper action can be taken to improve HCPs' participation in ADR reporting by understanding their attitudes [15, 17]. The majority of the HCPs believed that documentation and reporting of ADRs are important for a better healthcare system and patient safety. These findings are consistent with studies conducted in Pakistan [31], South Africa [32], Nepal [44], and India [45]. Similarly, most of the HCPs considered that ADR reporting should be made compulsories for all HCPs. This finding was also reported by Nisa et al, [31] Alshammari et al, [39] and Ali et al [41]. The majority of the HCPs also believed that PV should be included as a main topic in medical education and all HCPs need education about PV and ADR reporting systems. Similar findings were also documented in prior studies [9, 15, 31, 37]. It is critical to raise awareness about ADR reporting, and education interventions have a positive impact on attitude and raising ADR reporting awareness among HCPs [12, 31]. A recent study also reported a significant

**Table 8. Barriers-related questions and profession comparison (n = 412).**

| Barriers                                                        | Responses    | Doctor (n = 105) | Dentist (n = 38) | Pharmacist (n = 20) | Nurse (n = 150) | Midwife (n = 29) | Paramedic (n = 70) | Total            | *P-value |
|-----------------------------------------------------------------|--------------|------------------|------------------|---------------------|-----------------|------------------|--------------------|------------------|----------|
| Non-existence of a PV reporting center in the hospital.         |              |                  |                  |                     |                 |                  |                    |                  | 0.001    |
|                                                                 | Yes          | 39 (37.1)        | 14 (36.8)        | 12 (60)             | 87 (58)         | 17 (58.6)        | 9 (12.8)           | 178 (43.2)       |          |
|                                                                 | No           | 11 (10.5)        | 3 (7.9)          | 2 (10)              | 22 (14.7)       | 1 (3.4)          | 24 (34.3)          | 63 (15.3)        |          |
|                                                                 | I don't know | 55 (52.4)        | 21 (55.3)        | 6 (30)              | 41 (27.3)       | 11 (37.9)        | 37 (52.9)          | 171 (41.5)       |          |
| Lack of training/educational support.                           |              |                  |                  |                     |                 |                  |                    |                  | 0.001    |
|                                                                 | Yes          | 19 (18.1)        | 8 (21)           | 2 (10)              | 55 (36.7)       | 17 (58.6)        | 3 (4.3)            | 104 (25.2)       |          |
|                                                                 | No           | 27 (25.7)        | 7 (18.4)         | 7 (35)              | 22 (14.7)       | 3 (10.3)         | 18 (25.7)          | 84 (20.4)        |          |
|                                                                 | I don't know | 59 (56.2)        | 23 (60.5)        | 11 (55)             | 73 (48.6)       | 9 (31)           | 49 (70)            | 224 (54.4)       |          |
| Unavailability of ADR reporting forms in a health care setting. |              |                  |                  |                     |                 |                  |                    |                  | 0.001    |
|                                                                 | Yes          | 37 (35.2)        | 7 (18.4)         | 11 (55)             | 85 (56.7)       | 20 (69)          | 12 (17.1)          | 172 (41.7)       |          |
|                                                                 | No           | 27 (25.7)        | 10 (26.3)        | 5 (25)              | 27 (18)         | 2 (6.9)          | 27 (38.6)          | 98 (23.8)        |          |
|                                                                 | I don't know | 41 (39.1)        | 21 (55.3)        | 4 (20)              | 38 (25.3)       | 7 (24.1)         | 31 (44.3)          | 142 (34.5)       |          |
| More time-consuming                                             |              |                  |                  |                     |                 |                  |                    |                  | 0.001    |
|                                                                 | Yes          | 42 (40)          | 8 (21)           | 3 (15)              | 50 (33.3)       | 8 (27.6)         | 24 (34.3)          | 135 (32.8)       |          |
|                                                                 | No           | 41 (39)          | 18 (47.4)        | 17 (85)             | 68 (45.3)       | 17 (58.6)        | 18 (25.7)          | 179 (43.4)       |          |
|                                                                 | I don't know | 22 (21)          | 12 (31.6)        | 0 (0)               | 32 (21.3)       | 4 (13.8)         | 28 (40)            | 98 (23.8)        |          |
| Fear to harm the confidence of patients.                        |              |                  |                  |                     |                 |                  |                    |                  | 0.020    |
|                                                                 | Yes          | 16 (15.2)        | 1 (2.6)          | 2 (10)              | 30 (20)         | 4 (13.8)         | 8 (11.4)           | 61 (14.8)        |          |
|                                                                 | No           | 71 (67.7)        | 24 (63.2)        | 17 (85)             | 91 (60.7)       | 22 (75.9)        | 41 (58.6)          | 266 (64.6)       |          |
|                                                                 | I don't know | 18 (17.1)        | 13 (34.2)        | 1 (5)               | 29 (19.3)       | 3 (10.3)         | 21 (30)            | 85 (20.6)        |          |
| Lack of knowledge                                               |              |                  |                  |                     |                 |                  |                    |                  | 0.007    |
|                                                                 | Yes          | 51 (48.6)        | 13 (34.2)        | 14 (70)             | 68 (45.3)       | 15 (51.7)        | 24 (34.3)          | 185 (44.9)<br>** |          |
|                                                                 | No           | 34 (32.4)        | 11 (28.9)        | 4 (20)              | 53 (35.3)       | 11 (37.9)        | 19 (27.1)          | 132 (32)         |          |
|                                                                 | I don't know | 20 (19)          | 14 (36.8)        | 2 (10)              | 29 (19.3)       | 3 (10.3)         | 27 (38.6)          | 95 (23.1)        |          |
| Reporting forms are too complicated.                            |              |                  |                  |                     |                 |                  |                    |                  | 0.001    |
|                                                                 | Yes          | 24 (22.9)        | 7 (18.4)         | 4 (20)              | 46 (30.7)       | 7 (24.1)         | 8 (11.4)           | 96 (23.3)        |          |
|                                                                 | No           | 30 (28.6)        | 11 (28.9)        | 14 (70)             | 58 (38.7)       | 15 (51.7)        | 24 (34.3)          | 152 (36.9)       |          |
|                                                                 | I don't know | 51 (48.5)        | 20 (52.6)        | 2 (10)              | 46 (30.6)       | 7 (24.1)         | 38 (54.3)          | 164 (39.8)       |          |
| Fear of legal liability                                         |              |                  |                  |                     |                 |                  |                    |                  | 0.005    |
|                                                                 | Yes          | 28 (26.7)        | 2 (5.3)          | 4 (20)              | 46 (30.6)       | 8 (27.6)         | 16 (22.8)          | 104 (25.2)       |          |
|                                                                 | No           | 58 (55.2)        | 19 (50)          | 13 (65)             | 69 (46)         | 17 (58.6)        | 29 (41.4)          | 205 (49.8)       |          |
|                                                                 | I don't know | 19 (18.1)        | 17 (44.7)        | 3 (15)              | 35 (23.3)       | 4 (13.8)         | 25 (35.7)          | 103 (25)         |          |
| Lack of motivation                                              |              |                  |                  |                     |                 |                  |                    |                  | 0.093    |
|                                                                 | Yes          | 44 (41.9)        | 6 (15.8)         | 5 (25)              | 46 (30.6)       | 10 (34.5)        | 22 (31.4)          | 133 (32.3)       |          |
|                                                                 | No           | 47 (44.8)        | 23 (60.5)        | 12 (60)             | 70 (46.7)       | 15 (51.7)        | 28 (40)            | 195 (47.3)       |          |
|                                                                 | I don't know | 14 (13.3)        | 9 (23.7)         | 3 (15)              | 34 (22.6)       | 4 (13.8)         | 20 (28.6)          | 84 (20.4)        |          |
| No idea how to report ADR                                       |              |                  |                  |                     |                 |                  |                    |                  | 0.001    |
|                                                                 | Yes          | 57 (54.3)        | 12 (31.6)        | 3 (15)              | 53 (35.3)       | 9 (31)           | 33 (47.1)          | 167 (40.5)       |          |
|                                                                 | No           | 32 (30.5)        | 13 (34.2)        | 14 (70)             | 60 (40)         | 18 (62.1)        | 14 (20)            | 151 (36.7)       |          |

(Continued)

Table 8. (Continued)

| Barriers                                                  | Responses    | Doctor (n = 105) | Dentist (n = 38) | Pharmacist (n = 20) | Nurse (n = 150) | Midwife (n = 29) | Paramedic (n = 70) | Total            | *P-value |
|-----------------------------------------------------------|--------------|------------------|------------------|---------------------|-----------------|------------------|--------------------|------------------|----------|
|                                                           | I don't know | 16 (15.2)        | 13 (34.2)        | 3 (15)              | 37 (24.7)       | 2 (6.9)          | 23 (32.9)          | 94 (22.8)        |          |
| Inadequate knowledge of pharmacotherapy in detecting ADR. |              |                  |                  |                     |                 |                  |                    |                  | 0.004    |
|                                                           | Yes          | 47 (44.8)        | 14 (36.8)        | 7 (35)              | 57 (38)         | 11 (37.9)        | 30 (42.8)          | 166 (40.3)       |          |
|                                                           | No           | 44 (41.9)        | 13 (34.2)        | 13 (65)             | 56 (37.3)       | 16 (55.2)        | 18 (25.7)          | 160 (38.8)       |          |
|                                                           | I don't know | 14 (13.3)        | 11 (28.9)        | 0 (0)               | 37 (24.7)       | 2 (6.9)          | 22 (31.4)          | 86 (20.9)        |          |
| Lack of a professional atmosphere to discuss ADR.         |              |                  |                  |                     |                 |                  |                    |                  | 0.001    |
|                                                           | Yes          | 59 (56.2)        | 17 (44.7)        | 10 (50)             | 76 (50.7)       | 12 (41.4)        | 40 (57.1)          | 214 (51.9)<br>** |          |
|                                                           | No           | 26 (24.8)        | 11 (28.9)        | 9 (45)              | 42 (28)         | 14 (48.3)        | 6 (8.6)            | 108 (26.2)       |          |
|                                                           | I don't know | 20 (19)          | 10 (26.3)        | 1 (5)               | 32 (21.3)       | 3 (10.3)         | 24 (34.3)          | 90 (21.8)        |          |
| Higher workload                                           |              |                  |                  |                     |                 |                  |                    |                  | 0.040    |
|                                                           | Yes          | 78 (74.3)        | 20 (52.6)        | 12 (60)             | 95 (63.3)       | 18 (62.1)        | 40 (57.1)          | 263 (63.8)<br>** |          |
|                                                           | No           | 15 (14.3)        | 11 (28.9)        | 6 (30)              | 33 (22)         | 9 (31)           | 11 (15.7)          | 85 (20.6)        |          |
|                                                           | I don't know | 12 (11.4)        | 7 (18.4)         | 2 (10)              | 22 (14.7)       | 2 (6.9)          | 19 (27.1)          | 64 (15.5)        |          |
| Insufficient financial support                            |              |                  |                  |                     |                 |                  |                    |                  | 0.001    |
|                                                           | Yes          | 69 (65.7)        | 15 (39.5)        | 9 (45)              | 72 (48)         | 13 (44.8)        | 36 (51.4)          | 214 (51.9)<br>** |          |
|                                                           | No           | 21 (20)          | 12 (31.6)        | 8 (40)              | 52 (34.7)       | 11 (37.9)        | 8 (11.4)           | 112 (27.2)       |          |
|                                                           | I don't know | 15 (14.3)        | 11 (28.9)        | 3 (15)              | 26 (17.3)       | 5 (17.2)         | 26 (37.1)          | 86 (20.9)        |          |
| Forgetfulness is a barrier                                |              |                  |                  |                     |                 |                  |                    |                  | 0.53     |
|                                                           | Yes          | 41 (39)          | 9 (23.7)         | 4 (20)              | 63 (42)         | 12 (41.4)        | 28 (40)            | 157 (38.1)       |          |
|                                                           | No           | 50 (47.6)        | 18 (47.4)        | 11 (55)             | 69 (46)         | 14 (48.3)        | 24 (34.3)          | 186 (45.1)       |          |
|                                                           | I don't know | 14 (13.3)        | 11 (28.9)        | 5 (25)              | 18 (12)         | 3 (10.3)         | 18 (25.7)          | 69 (16.7)        |          |
| Thinking that a single ADR report makes no impact         |              |                  |                  |                     |                 |                  |                    |                  | 0.007    |
|                                                           | Yes          | 68 (64.8)        | 23 (60.5)        | 18 (90)             | 94 (62.7)       | 19 (65.5)        | 40 (57.1)          | 262 (63.6)<br>** |          |
|                                                           | No           | 21 (20)          | 6 (15.8)         | 1 (5)               | 35 (23.3)       | 7 (24.1)         | 7 (10)             | 77 (18.7)        |          |
|                                                           | I don't know | 16 (15.2)        | 9 (23.7)         | 1 (5)               | 21 (14)         | 3 (10.3)         | 23 (32.9)          | 73 (17.7)        |          |
| Other coworkers are not reporting ADR cases.              |              |                  |                  |                     |                 |                  |                    |                  | 0.102    |
|                                                           | Yes          | 19 (18.1)        | 8 (21)           | 3 (15)              | 37 (24.7)       | 8 (27.6)         | 15 (21.4)          | 90 (21.8)        |          |
|                                                           | No           | 30 (28.6)        | 7 (18.4)         | 2 (10)              | 46 (30.7)       | 9 (31)           | 11 (15.7)          | 105 (25.5)       |          |
|                                                           | I don't know | 56 (53.3)        | 23 (60.5)        | 15 (75)             | 67 (44.6)       | 12 (41.4)        | 44 (62.9)          | 217 (52.7)       |          |
| Thinking that ADR reporting is not a duty.                |              |                  |                  |                     |                 |                  |                    |                  | 0.004    |
|                                                           | Yes          | 25 (23.8)        | 7 (18.4)         | 3 (15)              | 29 (19.3)       | 7 (24.1)         | 14 (20)            | 85 (20.6)        |          |
|                                                           | No           | 55 (52.4)        | 20 (52.6)        | 17 (85)             | 85 (56.7)       | 15 (51.7)        | 24 (34.3)          | 216 (52.4)       |          |
|                                                           | I don't know | 25 (23.8)        | 11 (28.9)        | 0 (0)               | 36 (24)         | 7 (24.1)         | 32 (45.7)          | 111 (26.9)       |          |

\*P-value: Chi square test, PV: Pharmacovigilance, ADR: Adverse drug reaction,

\*\*Main barriers.

<https://doi.org/10.1371/journal.pone.0285811.t008>

improvements in attitude after an educational intervention [12]. Moreover, TÜFAM regulations mandate the inclusion of PV literature in educational program courses because there is no appropriate universal standard for PV training and teaching at the university level in Türkiye for students studying medicine, pharmacy, nursing, and other paramedical fields [10, 40, 46]. Therefore, periodic education and training are required to improve HCP attitudes and enhance PV activities.

As per the findings of current study, most of the HCPs had poor ADR reporting practice score. Although more than half of respondents (50.7%) encountered 1–5 to more than 20 ADRs during work experience, however, only 32.5% kept a record of an ADR and only 13.1% reported ADRs. Various studies have found similar trends, with the majority of HCPs failing to report any ADR despite encountering it during their practice [15, 17, 37, 47]. The rate of ADR reporting by various HCPs is very low in many countries [18, 32, 48, 49] including Türkiye [20–22, 50]. Our finding revealed that a higher proportion of pharmacists (55%) reported ADRs as compared to other HCPs. These findings were consistent with a previous study conducted in Thailand [38]. A higher value was reported in Saudi Arabia (71.3%) [51], Oman (69.2%) [52], Pakistan (67.6%) [17] and Ghana (66.7%) [53]. However, lower proportion of ADR reporting among pharmacist as compared to our findings was observed in Kuwait (26.8%) [54], Jordan (19.5%) [55] and Syria (10.8%) [56]. The provision of pharmaceutical care including PV activities is a professional responsibility for pharmacists [57]. Hospital pharmacists can not only identify and report ADRs, but also assist in reducing the financial burden associated with ADRs [17]. In Türkiye, like other HCPs, pharmacists are responsible for reporting ADRs to TÜFAM, and our study found that pharmacists are more aware of their responsibilities. However, more active involvement of hospital pharmacists is needed to ensure medicines safety by ADR reporting. Additionally, all dentists included in the current study also claimed that they did not send a suspected ADR report. These findings were consistent with previous studies [58–60]. Dental doctors prescribe a variety of therapeutic interventions, including allopathic medications such as local anesthetics, antibiotics, analgesics, and anti-inflammatory drugs [61]. Antibiotics and analgesics are two of the most common causes of ADRs [58, 61]. Oral signs and symptoms such as dry mouth, oral ulcers, taste changes, or swellings are reported to be caused by the medications' adverse effects [60]. Therefore, the risk of ADRs in dental practice cannot be ignored and the active role of dentists is crucial for an effective PV system and patient safety [58, 61]. Despite the crucial role of the dentist in patient safety, PV is still the least understood and practiced in dentistry [62]. Similarly, only 8.6% of the paramedics claimed to report ADRs. No studies were found in a literature search specifically related to PV and ADR reporting among paramedics. It is also vital to urge the paramedics to report ADRs for the more effective PV programs because they have longer and closer relationships with patients [63]. Education and involvement of paramedics in PV and ADR reporting are highly recommended [63, 64]. It was also demonstrated that the number of reports of ADR increased by 148% shortly after educational interventions [65]. The findings of current study demand the immediate attention for PV training modules implementation as soon as possible and all HCPs should be made aware of the importance of ADR reporting. Therefore, strategies for periodic educational intervention among all HCPs are required to improve ADR reporting practice and patient care.

It is also important to mention that, all ADRs related to herbs, cosmetics, vaccines, new drugs, etc. must be reported. ADRs related to herbal and traditional medications [66, 67], cosmetics [34, 68], vaccines [69, 70], newly approved drugs [71], and unknown ADRs to old drugs [72, 73] are well recognized. However, only 51% of HCPs considered the mandatory reporting of all ADRs. Similar findings were also reported in the South African study [32]. There are various global databases for the spontaneous reporting of all ADRs such as WHO

VigiBase [74], The United States Food and Drug Administration (FDA) Adverse Event Reporting System (AERS) [75], the Vaccine Adverse Event Reporting System (VAERS) [76], the European Medicines Agency (EMA) EudraVigilance (EV) [77]. TÜFAM utilizes a web-based approach (Vigiflow database) for the reporting of ADRs to the WHO-UMC database. TÜFAM developed an online ADR reporting form for ADR, adverse drug events, herbal drugs, vaccines [78], and cosmetics [79]. However, unawareness among HCPs regarding PV and ADR reporting methods is observed in the current study and also in previously published studies [37, 44]. There is a need for educating HCPs about PV, and ADR reporting structures and modalities for a better healthcare system.

In our study, more than half (60.4%) of the HCPs were untrained about PV and ADR reporting. Previous studies conducted in Nigeria (86.5%) [27], Saudi Arabia (76.3%) [80], South Africa (68.3%) [81], Ethiopia (55.5%) [15], Finland (48%) [48], and Ghana (37.1%) [53] reported that various proportion of HCPs had no training on PV and ADR reporting. Our results also showed that lack of training was the predictors of poor ADR reporting practice among HCPs. Previous studies demonstrated that education and training have a positive effect on HCPs' willingness to report an ADR, awareness of PV, and increase ADR reporting rates [12, 32, 47]. It is also revealed that a lack of ADR reporting training was significantly associated with insufficient knowledge of PV and ADRs [12, 15]. Continuous education and training are very important for PV understanding and an increasing trend in ADR reporting was observed after training [47]. Additionally, a research study showed periodic training, lectures, education, regular newsletters on recent knowledge in the safety of the drug, information about new ADRs, and international safety information on drugs are the best ways to raise awareness about PV and the rate of ADR among HCPs [82]. In Türkiye, TÜFAM is primarily responsible for educating and training of HCPs. Additionally, supporting stakeholders including medical schools, pharmacology departments, and hospital PV centers are also accountable for PV-based awareness programs [10, 21]. However, TÜFAM and other stakeholders are unsuccessful to arrange training, education sessions, and reviews of HCPs' actions in a timely and systematic way [9, 20]. Therefore, it is necessary to provide more training to HCPs on PV activities, ADR identification, the aim of ADR reporting, and the resources that are available for ADR reporting.

Our study identified several factors, including higher workload, the belief that a single ADR report has no impact, a lack of a professional atmosphere, a lack of support by health care authorities, and lack of knowledge as the main barriers that were intended to discourage reporting of ADRs among HCPs. Similarly, a study conducted in Pakistan observed the unavailability of a professional environment in the health setup to discuss an ADR and the lack of incentives for reporting ADRs as the main barrier among HCPs [41]. Another study carried out in Ethiopia revealed that poor knowledge and lack of training were predictors of poor ADR reporting practice [15]. Various studies highlighted many variables that may contribute to the under-reporting of ADRs, including a lack of time, ambiguity about the nature of drug reactions to report, not knowing where to report, and lack of ADR reporting forms and training [37, 83, 84]. Our recently published systematic review also highlighted that lack of time, uncertainty regarding ADRs and did not know where to report were the most frequently reported barriers to PV among HCPs in Türkiye [9]. A single-center local study reported that unawareness of the national PV system and spontaneous reporting of ADRs were the main discouraging factors [40]. It is highly suggested that improved activities of regional PV centers, interprofessional and collaborative links between HCPs, ongoing educational interventions (lectures, oral workshops, presentations, group discussions, and hands-on training), systematic follow-up by local health care policymakers, offering incentives to HCPs, implementation of mandatory reporting policy for HCPs and automation and utilization of artificial intelligence

in the screening and reporting of ADRs are crucial for a better PV system in Türkiye and around the world [9, 11, 15, 82, 85].

### Limitation and strength

This research study had several limitations such as involving only one province and unequal distribution of respondents from the various HCPs groups. For example, there was low participation from pharmacists (4.8%), midwives (7%), and dentists (9.2%) out of the whole HCPs sample. We're not sure why, but possible explanations include being hesitant to participate, too busy, or being on night duty at the 24-hour. However, nurses, doctors, and paramedics took part in more participation. Furthermore, qualitative research methodologies would have provided a more comprehensive understanding. Future study is needed to plan and address these matters. Convenience sampling was used to select the participants, so the sample may not accurately reflect the entire population. Another issue was the length of our survey (58 questions); some HCPs may be discouraged from participating solely because of this factor. The study was a cross-sectional study, so no causal inferences can be drawn. This study only included HCPs from the Adana region of Türkiye, which limits the generalizability of the findings. However, Adana is Türkiye's fifth largest province (with a population of 1248988). Hence, it is anticipated that the results in the other areas would not differ significantly. The current study also relies on self-reported data, which can be subject to bias. Finally, our study identify the perceived barriers towards PV and ADR reporting but did not explore the specific reasons why HCPs had poor knowledge and practices, which could have provided insights for interventions to improve PV and ADR reporting. These points should be considered in future studies.

Regardless of these limitations, we believe that our findings are sound and will help authorities improve PV activities in the future. This is the first study in Türkiye on the KAP of HCPs (including paramedics) toward PV and ADR reporting and will provide baseline data for further research studies. We believe that the results would not change significantly and that limited knowledge of PV and ADR activities is a widespread national/global issue. The current study's findings suggest that all HCPs should receive drug safety knowledge and training about ADR reporting. To accomplish this, a hands-on training and workshop system for dealing with ADR must be organized at the hospital level. Furthermore, cooperation amongst academic institutes, drug manufacturers, regulatory authorities, and HCPs should be expanded to sensitize reporting practices of ADRs.

### Conclusion

This study conclude that most of HCPs had poor knowledge and practice, but they had a positive attitude about PV and ADR reporting. Lack of training and under-reporting of ADRs was observed among HCPs. Barriers to under-reporting of ADR were also highlighted. Periodic training programs, educational interventions, systematic follow-up of HCPs by local health-care authorities, interprofessional links between all HCPs, and implementation of mandatory reporting policy are crucial for better HCPs' knowledge, practices, patient safety, and improved PV activities.

### Supporting information

**S1 File. Data collection tool (English and Turkish version questionnaires).**  
(PDF)

**S1 Table. Knowledge, attitude and practice score level among various profession of HCP.**  
(DOCX)

## Acknowledgments

Thanks to the ministry of health, provincial health directorate (Sağlık Bakanlığı, Adana il sağlık müdürlüğü) office in Adana, BAP (Bilimsel araştırma project no: TDK-2021-14258) coordinators from Cukurova University, Adana, Türkiye and all healthcare professionals for their assistance and cooperation during data collection.

## Author Contributions

**Conceptualization:** Zakir Khan, Yusuf Karatas, Syed Muhammad Hamid.

**Data curation:** Zakir Khan.

**Formal analysis:** Yusuf Karatas.

**Investigation:** Zakir Khan.

**Methodology:** Zakir Khan, Yusuf Karatas.

**Software:** Syed Muhammad Hamid.

**Supervision:** Yusuf Karatas.

**Validation:** Zakir Khan, Yusuf Karatas, Syed Muhammad Hamid.

**Visualization:** Syed Muhammad Hamid.

**Writing – original draft:** Zakir Khan, Yusuf Karatas.

**Writing – review & editing:** Zakir Khan, Yusuf Karatas, Syed Muhammad Hamid.

## References

1. World Health Organization (WHO). The safety of medicines in public health programmes: pharmacovigilance an essential tool. 2006 [Cited 17 Jan 2023]. <https://apps.who.int/iris/handle/10665/43384>.
2. Coleman JJ, Pontefract SK. Adverse drug reactions. *Clin Med (Lond)*. 2016; 16(5): 481–485. <https://doi.org/10.7861/clinmedicine.16-5-481> PMID: 27697815
3. Khan Z, Muhammad K, Karatas Y, Bilen C, Khan FU, Khan FU. Pharmacovigilance and incidence of adverse drug reactions in hospitalized pediatric patients: a mini systematic review. *Egypt Pediatric Association Gaz*. 2020; 68: 24–31. <https://doi.org/10.1186/s43054-020-00038-8>
4. Shamim S, Sharib SM, Malhi SM, Muntaha SU, Raza H, Ata S, et al. Adverse drug reactions (ADRS) reporting: awareness and reasons of under-reporting among health care professionals, a challenge for pharmacists. *Springerplus*. 2016; 5: 1778–1780. <https://doi.org/10.1186/s40064-016-3337-4> PMID: 27795920
5. Hu W, Tao Y, Lu Y, Gao S, Wang X, Li W, et al. Knowledge, Attitude and Practice of Hospital Pharmacists in Central China Towards Adverse Drug Reaction Reporting: A Multicenter Cross-Sectional Study. *Front Pharmacol*. 2022; 13: 823944. <https://doi.org/10.3389/fphar.2022.823944> PMID: 35392558
6. Bouvy JC, De Bruin ML, Koopmanschap MA. Epidemiology of adverse drug reactions in Europe: a review of recent observational studies. *Drug Saf*. 2015; 38: 437–453. <https://doi.org/10.1007/s40264-015-0281-0> PMID: 25822400
7. Cullen DJ, Sweitzer BJ, Bates DW, Burdick E, Edmondson A, Leape LL. Preventable Adverse Drug Events in Hospitalized Patients: a Comparative Study of Intensive Care and General Care Units. *Crit Care Med*. 1997; 25: 1289–1297. <https://doi.org/10.1097/00003246-199708000-00014> PMID: 9267940
8. Khan Z, Karatas Y, Kiroğlu O. Evaluation of Adverse Drug Reactions in Paediatric Patients: A Retrospective Study in Turkish Hospital. *Front Pharmacol*. 2021; 12: 786182. <https://doi.org/10.3389/fphar.2021.786182> PMID: 34867419
9. Khan Z, Karatas Y, Martins MAP, Jamshed S, Rahman H. Knowledge, attitude, practice and barriers towards pharmacovigilance and adverse drug reactions reporting among healthcare professionals in Turkey: a systematic review. *Curr Med Res Opin*. 2022; 38: 145–154. <https://doi.org/10.1080/03007995.2021.1997287> PMID: 34694167

10. Güner MD, Ekmekci PE. Healthcare professionals' pharmacovigilance knowledge and adverse drug reaction reporting behavior and factors determining the reporting rates. *J Drug Assess.* 2019; 8: 13–20. <https://doi.org/10.1080/21556660.2019.1566137> PMID: 30729064
11. Asiamah M, Akuffo KO, Nortey P, Donkor N, Danso-Appiah A. Spontaneous reporting of adverse drug reaction among health professionals in Ghana. *Arch Public Health.* 2022; 80: 33–43. <https://doi.org/10.1186/s13690-021-00783-1> PMID: 35057859
12. Shrestha S, Sharma S, Bhasima R, Kunwor P, Adhikari B, Sapkota B. Impact of an educational intervention on pharmacovigilance knowledge and attitudes among health professionals in a Nepal cancer hospital. *BMC Med Educ.* 2020; 20: 179–188. <https://doi.org/10.1186/s12909-020-02084-7> PMID: 32493307
13. Danekhu K, Shrestha S, Aryal S, Shankar PR. Health-care Professionals' Knowledge and Perception of Adverse Drug Reaction Reporting and Pharmacovigilance in a Tertiary Care Teaching Hospital of Nepal. *Hosp Pharm.* 2021; 56(3):178–186. <https://doi.org/10.1177/0018578719883796> PMID: 34024926
14. Hazell L, Shakir SAW. Under-reporting of adverse drug reactions: a systematic review. *Drug Saf.* 2006; 29: 385–96.
15. Gidey K, Seifu M, Hailu BY, Asgedom SW, Niriayo YL. Healthcare professionals knowledge, attitude and practice of adverse drug reactions reporting in Ethiopia: a cross-sectional study. *BMJ Open.* 2020; 10(2):e034553. <https://doi.org/10.1136/bmjopen-2019-034553> PMID: 32102821
16. Al Dweik R, Stacey D, Kohen D, Yaya S. Factors affecting patient reporting of adverse drug reactions: a systematic review. *Br J Clin Pharmacol.* 2017; 83(4):875–883. <https://doi.org/10.1111/bcp.13159> PMID: 27868226
17. Hussain R, Hassali MA, Hashmi F, Akram T. Exploring healthcare professionals' knowledge, attitude, and practices towards pharmacovigilance: a cross-sectional survey. *J Pharm Policy Pract.* 2021; 14: 5–17. <https://doi.org/10.1186/s40545-020-00287-3> PMID: 33397478
18. Aagaard L, Strandell J, Melskens L, Petersen PS, Holme Hansen E. Global patterns of adverse drug reactions over a decade: analyses of spontaneous reports to VigiBase™. *Drug Saf.* 2012; 35:1171–1182. <https://doi.org/10.1007/BF03262002> PMID: 23072620
19. The Turkish Medicines and Medical Devices Agency. Regulation on safety of medicines [Turkish: Türkiye İlaç ve Tıbbi Cihaz Kurumu. İlaçların Güvenliliği Hakkında Yönetmelik]. 2014 [Cited 2023 Jan 25]. <https://www.resmigazete.gov.tr/eskiler/2014/04/20140415-6.htm>.
20. Ozcan G, Aykac E, Kasap Y, Nemutlu NT, Sen E, Aydinkarahaliloglu ND. Adverse Drug Reaction Reporting Pattern in Turkey: Analysis of the National Database in the Context of the First Pharmacovigilance Legislation. *Drugs Real World Outcomes.* 2016; 3: 33–43. <https://doi.org/10.1007/s40801-015-0054-1> PMID: 27747800
21. Khan Z, Karatas Y. Adverse drug reaction reporting for more than a decade: The need for pharmacovigilance policy implementation in Turkey. *J Taibah Univ Med Sci.* 2022; 17: 340–342. <https://doi.org/10.1016/j.jtumed.2021.12.009> PMID: 35592804
22. Turkish Ministry of Health. Turkish medicines and medical devices agency. Activity report. [Turkish: Türkiye Cumhuriyeti Sağlık Bakanlığı. Türkiye İlaç ve Tıbbi Cihaz Kurumu. 2022. [Cited 2023 Jan 26]. <https://www.titck.gov.tr/kurumsal/faaliyetraporu>.
23. World health organization (WHO) programme for international drug monitoring. Members of the who programme for international drug monitoring. 2021 [Cited 2023 Jan 25]. <https://www.who-umc.org/global-pharmacovigilance/who-programme-for-international-drug-monitoring/who-programme-members/>.
24. Sisay T, Wami R. Adverse drug reactions among major depressive disorders: patterns by age and gender. *Heliyon.* 2021; 7(12): e08655. <https://doi.org/10.1016/j.heliyon.2021.e08655> PMID: 35005292
25. Rosli R, Ming LC, Abd Aziz N, Manan MM. A Retrospective Analysis of Spontaneous Adverse Drug Reactions Reports Relating to Paediatric Patients. *PLoS ONE.* 2016; 11: e0155385. <https://doi.org/10.1371/journal.pone.0155385> PMID: 27249414
26. Tekel MT, Bekalu AF, Sema FD. Knowledge, Attitude, and Practice of Medical, Pharmacy, and Nursing Students Towards Pharmacovigilance and Adverse Drug Reaction Reporting at University of Gondar College of Medicine and Health Sciences, Northwest Ethiopia: A Cross-Sectional Study. *Adv Med Educ Pract* 2021; 12: 1129–1139. <https://doi.org/10.2147/AMEP.S327739> PMID: 34629925
27. Adisa R, Omitogun TI. Awareness, knowledge, attitude and practice of adverse drug reaction reporting among health workers and patients in selected primary healthcare centres in Ibadan, southwestern Nigeria. *BMC Health Serv Res.* 2019; 19: 926–939. <https://doi.org/10.1186/s12913-019-4775-9> PMID: 31796034
28. Efil M, Negida A. Sampling methods in clinical research: an educational review. *Emerg (Tehran).* 2017; 5: e52. PMID: 28286859



29. Ministry of health provincial health directorate, Adana. [Turkish: Sağlık bakanlığı. Adana il sağlık müdürlüğü]. 2023 [Cited 2023 February 02]. <https://adanaism.saglik.gov.tr/>.
30. Raosoft sample size calculator. 2023 2023 [Cited 2023 February 02] <http://www.raosoft.com/samplesize.html>.
31. Nisa ZU, Zafar A, Sher F. Assessment of knowledge, attitude and practice of adverse drug reaction reporting among healthcare professionals in secondary and tertiary hospitals in the capital of Pakistan. *Saudi Pharm J*. 2018; 26: 453–46. <https://doi.org/10.1016/j.jsps.2018.02.014> PMID: 29844715
32. Haines HM, Meyer JC, Summers RS, Godman BB. Knowledge, attitudes and practices of health care professionals towards adverse drug reaction reporting in public sector primary health care facilities in a South African district. *Eur J Clin Pharmacol*. 2020; 76: 991–1001. <https://doi.org/10.1007/s00228-020-02862-8> PMID: 32296857
33. Chindhalore CA, Dakhale GN, Gupta AV. Does educational intervention change knowledge, attitude, and practice regarding pharmacovigilance among nursing officers in Central India? An interventional study. *J Integr Nurs* 2022; 4: 114–119.
34. Hadi H, Ihsan Awadh A, Zamli M, Ai N, Jamshed S. Insight of Malaysian Users of Cosmetic Regarding Cosmetovigilance. *Cosmetics*. 2020; 7: 45–46. <https://doi.org/10.3390/cosmetics7020045>
35. Maneesriwongul W, Dixon JK. Instrument translation process: a methods review. *J Adv Nurs*. 2004; 48: 175–186. <https://doi.org/10.1111/j.1365-2648.2004.03185.x> PMID: 15369498
36. World Health Organization (WHO). Essential medicines and health products: Pharmacovigilance. Readings. 2004 2023 [Cited 2023 February 04]. [https://www.who.int/medicines/technical\\_briefing/tbs/safety-rdg-prs/en/](https://www.who.int/medicines/technical_briefing/tbs/safety-rdg-prs/en/).
37. Adegbuyi TA, Fadare JO, Araromi EJ, Sijuade AO, Bankole I, Fasuba IK, et al. Assessment of Knowledge, Attitude and Practice of Adverse Drug Reaction Reporting Among Healthcare Professionals working in Primary, Secondary and Tertiary Healthcare Facilities in Ekiti State, South-West Nigeria. *Hosp Pharm*. 2021; 56: 751–759. <https://doi.org/10.1177/0018578720957968> PMID: 34732934
38. Srisuriyachanchai W, Cox AR, Jaremsiripornkul N. Exploring Healthcare Professionals' Practices and Attitudes towards Monitoring and Reporting of Severe Adverse Drug Reactions. *Healthcare (Basel)*. 2022; 10: 1077–1088. <https://doi.org/10.3390/healthcare10061077> PMID: 35742128
39. AlShammari TM, Almoslem MJ. Knowledge, attitudes & practices of healthcare professionals in hospitals towards the reporting of adverse drug reactions in Saudi Arabia: A multi-centre cross sectional study. *Saudi Pharm J*. 2018; 26: 925–931. <https://doi.org/10.1016/j.jsps.2018.04.012> PMID: 30416347
40. Ergün Y, Ergün TB, Toker E, Ünal E, Akben M. Knowledge attitude and practice of Turkish health professionals towards pharmacovigilance in a university hospital. *Int Health*. 2019; 11: 177–184. <https://doi.org/10.1093/inthealth/ihy073> PMID: 30265317
41. Ali I, Ahmad W, Ullah AR, Khan F, Ijaz M, Khan S, et al. Knowledge, Attitude, and Barriers Toward ADRs Reporting Among Health-Care Professionals at Tertiary Care Health Settings in Peshawar, Pakistan: A Web Based Study. *Hosp Pharm*. 2021; 56: 384–391. <https://doi.org/10.1177/0018578720910401> PMID: 34381279
42. Shakya-Gurung R, Shrestha D, Thapa R. Assessment on Knowledge, Attitude and Practice of Pharmacovigilance among the Healthcare Professionals in a Tertiary Hospital of Kathmandu. *Nep. Med. Coll. J*. 2019; 21: 53–59. <https://www.nepjol.info/index.php/nmcj/article/view/24854>.
43. Mustafa ZU, Salman M, Asif N, Rao AZ.; Khan QUA, Nawaz AS, et al. (2021) "Knowledge, Attitude, Practices, and Barriers of Pharmacovigilance among Healthcare Workers: A Cross-sectional Survey from Lahore, Pakistan. *Bulletin of Faculty of Pharmacy Cairo University*. 2021; 59: 34–43. Available at: <https://doi.org/10.54634/2090-9101.1023>
44. Santosh KC, Tragulpiankit P, Gorsanan S, Edwards IR. Attitudes among healthcare professionals to the reporting of adverse drug reactions in Nepal. *BMC Pharmacol Toxicol*. 2013; 14: 16–22. <https://doi.org/10.1186/2050-6511-14-16> PMID: 23497690
45. Desai CK, Iyer G, Panchal J, Shah S, Dikshit RK. An evaluation of knowledge, attitude, and practice of adverse drug reaction reporting among prescribers at a tertiary care hospital. *Perspect Clin Res*. 2011; 2: 129:136. <https://doi.org/10.4103/2229-3485.86883> PMID: 22145123
46. Khan Z, Karataş Y, Rahman H. Adverse drug reactions reporting in Turkey and barriers: an urgent need for pharmacovigilance education. *Ther Adv Drug Saf*. 2020; 11: 2042098620922483. <https://doi.org/10.1177/2042098620922483> PMID: 32435444
47. Gordhon Y, Padayachee N. Evaluating the knowledge, attitudes and practices of healthcare workers towards adverse drug reaction reporting at a public tertiary hospital in Johannesburg. *Int J Afr Nurs Sci*. 2020; 12: 100191. <https://doi.org/10.1016/j.ijans.2020.100191>

48. Sandberg A, Salminen V, Heinonen S, Sivén M. Under-Reporting of Adverse Drug Reactions in Finland and Healthcare Professionals' Perspectives on How to Improve Reporting. *Healthcare (Basel)*. 2022; 10: 1015. <https://doi.org/10.3390/healthcare10061015> PMID: 35742066
49. Garashi HY, Steinke DT, Schafheutle EI. A Systematic Review of Pharmacovigilance Systems in Developing Countries Using the WHO Pharmacovigilance Indicators. *Ther Innov Regul Sci*. 2022; 56: 717–743. <https://doi.org/10.1007/s43441-022-00415-y> PMID: 35657484
50. Aydıncarhaliloğlu ND, Aykaç E, Atalan Ö, Nilcan DN, Mutlu HM. Spontaneous reporting of adverse drug reactions by consumers in comparison with healthcare professionals in Turkey from 2014 to 2016. *Pharm Med*. 2018; 32: 353–364. <https://doi.org/10.1007/s40290-018-0244-8>
51. Alshabi AM, Shaikh MAK, Shaikh IA, Alkahtani SA, Aljadaan A. Knowledge, attitude and practice of hospital pharmacists towards pharmacovigilance and adverse drug reaction reporting in Najran, Saudi Arabia. *Saudi Pharm J*. 2022; 30: 1018–1026. <https://doi.org/10.1016/j.jsps.2022.04.014> PMID: 35903528
52. Jose J, Jimmy B, Al-Ghailani AS, Al Majali MA. A cross sectional pilot study on assessing the knowledge, attitude and behavior of community pharmacists to adverse drug reaction related aspects in the Sultanate of Oman. *Saudi Pharm J*. 2014; 22: 163–169. <https://doi.org/10.1016/j.jsps.2013.07.006> PMID: 24648829
53. Yawson AA, Abekah-Nkrumah G, Okai GA, Ofori CG. Awareness, knowledge, and attitude toward adverse drug reaction (ADR) reporting among healthcare professionals in Ghana. *Ther Adv Drug Saf*. 2022; 13: 20420986221116468. <https://doi.org/10.1177/20420986221116468> PMID: 35966898
54. Alsaleh FM, Alzaid SW, Abahussain EA, Bayoud T, Lemay J. Knowledge, attitude and practices of pharmacovigilance and adverse drug reaction reporting among pharmacists working in secondary and tertiary governmental hospitals in Kuwait. *Saudi Pharm J*. 2017; 25: 830–837. <https://doi.org/10.1016/j.jsps.2016.12.004> PMID: 28951666
55. Suyagh M, Farah D, Abu Farha R. Pharmacist's knowledge, practice and attitudes toward pharmacovigilance and adverse drug reactions reporting process. *Saudi Pharm J*. 2015; 23: 147–153. <https://doi.org/10.1016/j.jsps.2014.07.001> PMID: 25972734
56. Bahnassi A, Al-Harbi F. Syrian pharmacovigilance system: a survey of pharmacists' knowledge, attitudes and practices. *East Mediterr Health J*. 2018; 24: 569–578. <https://doi.org/10.26719/2018.24.6.569> PMID: 30079952
57. Karuppannan M, Mohamad RNAN, Wong KT, Mohd Ali S, Ting KN, Boardman H. Pharmacists' experiences on adverse drug reaction: 10 years later. *Front Pharmacol*. 2022; 13: 932942. <https://doi.org/10.3389/fphar.2022.932942> PMID: 36249772
58. Karataş Y, Khan Z, Gören ÖES, Abussuutoğlu AB, Pelit A, Koçak E. Knowledge, attitude and practices about pharmacovigilance and adverse drug reactions among dental research assistants in a Turkish hospital: a cross-sectional study. *Journal of Health Sciences and Medicine*. 2020; 3:367–371. <https://doi.org/10.32322/jhsm.720938>
59. Patel MM, Radford DR, Brown D. Preaching to the converted—optimising adverse drug reaction reporting by dentists. *Br Dent J*. 2014; 217: E4. <https://doi.org/10.1038/sj.bdj.2014.598> PMID: 25060479
60. Bakhtiari S, Sehatpour M, Mortazavi H, Bakhshi M. Orofacial manifestations of adverse drug reactions: a review study. *Ciujul Med*. 2018; 91: 27–36. <https://doi.org/10.15386/cjmed-748> PMID: 29440948
61. Khan SA, Goyal C, Tonpay SD. A study of knowledge, attitudes, and practice of dental doctors about adverse drug reaction reporting in a teaching hospital in India. *Perspect Clin Res*. 2015; 6: 144–9. <https://doi.org/10.4103/2229-3485.159938> PMID: 26229750
62. Chhabra C, Chhabra KG, Goyal A, Rajesh G, Binnal A. Pharmacovigilance: The Least Understood and Least Practiced Science in Dentistry. *World J Dent*. 2019; 10: 402–406.
63. Hardeep, Bajaj JK, Rakesh K. A survey on the knowledge, attitude and the practice of pharmacovigilance among the health care professionals in a teaching hospital in northern India. *J Clin Diagn Res*. 2013; 7: 97–99. <https://doi.org/10.7860/JCDR/2012/4883.2680> PMID: 23449824
64. Thangaraju P, Venkatesan S, Tamilselvan T, Sivashanmugam E, Showkath Ali MK. Evaluation of awareness about pharmacovigilance and adverse drug reaction monitoring among medical professionals attending Central Leprosy Institute. *Mustansiriya Med J*. 2018; 17:63–8.
65. Figueiras A, Herdeiro MT, Polónia J, Gestal-Otero JJ. An educational intervention to improve physician reporting of adverse drug reactions: a cluster-randomized controlled trial. *JAMA*. 2006; 296: 1086–1093. <https://doi.org/10.1001/jama.296.9.1086> PMID: 16954488
66. van Hunsel F, van de Koppel S, Skalli S, Kuemmerle A, Teng L, Wang JB, et al. Analysis of Hepatobiliary Disorder Reports Associated With the Use of Herbal Medicines in the Global Suspected ADR Database Vigibase. *Front Pharmacol*. 2019; 10: 1326. <https://doi.org/10.3389/fphar.2019.01326> PMID: 31780942

67. Chang HH, Chiang SY, Chen PC, Tsai CH, Yang RC, Tsai CL, et al. A system for reporting and evaluating adverse drug reactions of herbal medicine in Taiwan from 1998 to 2016. *Sci Rep.* 2021; 11: 21476. <https://doi.org/10.1038/s41598-021-00704-w> PMID: 34728662
68. Lucca JM, Joseph R, Hussain Al-Kubaish Z, Mohammad Al-Maskeen S, Ali-Alokaili Z. An observational study on adverse reactions of cosmetics: The need of practice the Cosmetovigilance system. *Saudi Pharm J.* 2020; 28: 746–753. <https://doi.org/10.1016/j.jsps.2020.04.017> PMID: 32550807
69. Deb T, Garg R, Kaur M, Beniwal A, Gupta V. ADR Profile of the Covishield Vaccine Among Healthcare Workers in a Tertiary Care Teaching Hospital in India. *Curr Drug Saf.* 2022; 17: 344–349. <https://doi.org/10.2174/1574886317666220113101815> PMID: 35049437
70. Alfaleh A, Alkattan A, Radwan N, Elzohri M, Alzaher A, Ibrahim M, et al. Adverse drug reactions from two COVID-19 vaccines reported in Saudi Arabia. *Drugs Ther Perspect.* 2022; 38: 84–92. <https://doi.org/10.1007/s40267-022-00893-y> PMID: 35095267
71. Wu L, Ingle T, Liu Z, Zhao-Wong A, Harris S, Thakkar S, et al. Study of serious adverse drug reactions using FDA-approved drug labeling and MedDRA. *BMC Bioinformatics.* 2019; 20: 97. <https://doi.org/10.1186/s12859-019-2628-5> PMID: 30871458
72. Bean DM, Wu H, Iqbal E, Dzahini O, Ibrahim ZM, Broadbent M, et al. Knowledge graph prediction of unknown adverse drug reactions and validation in electronic health records. *Sci Rep.* 2017; 7: 16416. <https://doi.org/10.1038/s41598-017-16674-x> PMID: 29180758
73. Dubrall D, Schmid M, Alešik E, Paeschke N, Stingl J, Sachs B. Frequent Adverse Drug Reactions, and Medication Groups under Suspicion. *Dtsch Arztebl Int.* 2018; 115: 393–400. <https://doi.org/10.3238/arztebl.2018.0393> PMID: 29960607
74. World Health Organization-Uppsala Monitoring Centre (WHO-UMC). What is VigiBase?. [Cited 2023 February 11]. <https://who-umc.org/vigibase/>.
75. Fornasier G, Francescon S, Leone R, Baldo P. An historical overview over Pharmacovigilance. *Int J Clin Pharm.* 2018; 40: 744–747. <https://doi.org/10.1007/s11096-018-0657-1> PMID: 29948743
76. The United States Food and Drug administration (FDA). Vaccine Adverse Event Reporting System (VAERS) Questions and Answers. 2021 [Cited 2023 February 11]. <https://www.fda.gov/vaccines-blood-biologics/vaccine-adverse-events/vaccine-adverse-event-reporting-system-vaers-questions-and-answers>.
77. European Medicines Agency (EMA). Pharmacovigilance: Overview. 2022 [Cited 2023 February 11]. <https://www.ema.europa.eu/en/human-regulatory/overview/pharmacovigilance-overview>.
78. The Turkish Medicines and Medical Devices Agency. Pharmacovigilance. Forms. [Turkish: Türkiye İlaç ve Tıbbi Cihaz Kurumu. Farmakovijilans. Formlar]. 2023 [Cited 2023 February 11]. <https://www.titck.gov.tr/faaliyetalanlari/ilac/18>.
79. The Turkish Medicines and Medical Devices Agency. Cosmetovigilance [Turkish: Türkiye İlaç ve Tıbbi Cihaz Kurumu. Kozmetovijilans]. 2023 [Cited 2023 February 11]. <https://www.titck.gov.tr/faaliyetalanlari/denetim/kozmetovijilans>.
80. Ali MD, Hassan YA, Ahmad A, Alaqel O, Al-Harbi H, Al-Suhaimi NM. Knowledge, practice and attitudes toward pharmacovigilance and adverse drug reactions reporting process among health care providers in Dammam, Saudi Arabia. *Curr Drug Saf.* 2018; 13: 21–25. <https://doi.org/10.2174/1574886313666171218123802> PMID: 29256354
81. Bogolubova S, Padayachee N, Schellack N. Knowledge, attitudes and practices of nurses and pharmacists towards adverse drug reaction reporting in the South African private hospital sector. *Health SA.* 2018; 23: 1064. <https://doi.org/10.4102/hsag.v23i0.1064> PMID: 31934371
82. Potlog Shchory M, Goldstein LH, Arcavi L, Shihmanter R, Berkovitch M, Levy A. Increasing adverse drug reaction reporting-How can we do better? *PLoS One.* 2020; 15: e0235591. <https://doi.org/10.1371/journal.pone.0235591> PMID: 32790671
83. Terblanche A, Meyer JC, Godman B, Summers RS. Knowledge, attitudes and perspective on adverse drug reaction reporting in a public sector hospital in South Africa: baseline analysis. *Hosp Pract.* 2017; 45: 238–245. <https://doi.org/10.1080/21548331.2017.1381013> PMID: 28914115
84. Chang F, Xi Y, Zhao J, Zhang X, Lu Y. A time series analysis of the effects of financial incentives and mandatory clinical applications as interventions to improve spontaneous adverse drug reaction reporting by hospital medical staff in China. *J Eval Clin Pract.* 2017; 23:1316–1321. <https://doi.org/10.1111/jep.12780> PMID: 28675578
85. Li R, Curtis K, Zaidi ST, Van C, Castelino R. A new paradigm in adverse drug reaction reporting: consolidating the evidence for an intervention to improve reporting. *Expert Opin Drug Saf.* 2022; 21: 1193–1204. <https://doi.org/10.1080/14740338.2022.2118712> PMID: 36031811
